# Supplementary material for: The Size and Content of the Sex-Determining Region of the Y Chromosome in Dioecious <em>Mercurialis annua</em>, a Plant with Homomorphic Sex Chromosomes
Source: Preprints.org preprint supplement (doi:10.20944/preprints201804.0128.v1), 2018-04-10
Supplement: Supplementary file 1 [file File S1 - BLAST summary.xlsx]

## Sheet: Summary
Name	Annotation	type	length_nt	sum_hits	complete_hit	Multiple gene hits	minBAC	maxBAC	BAC	Other BAC	rough identity	BAC_block
comp16827_c0_seq1_m.24466	fbk8_arath ame: full=f-box kelch-repeat protein at1g22040	complete	888	888	Yes	No	6945	7412	BAC 10		0.85	bac10.1
comp16827_c0_seq1_m.24467		5prime_partial	474	470	No	No	6945	7412	BAC 10		0.921	bac10.1
comp5423_c0_seq1_m.1852		complete	357	314	No	No	19547	19860	BAC 10		0.812	bac10.2
comp1743_c0_seq1_m.412		5prime_partial	495	371	No	No	31953	32309	BAC 10		0.784	bac10.3
comp10954_c0_seq2_m.16695		internal	345	326	No	No	86322	86647	BAC 10		0.936	bac10.4
comp11552_c1_seq1_m.33788		5prime_partial	450	452	No	No	86550	87145	BAC 10		0.9435	bac10.5
comp11552_c1_seq2_m.33789		5prime_partial	450	452	No	No	86550	87145	BAC 10		0.962	bac10.5
comp1180_c0_seq1_m.306		internal	453	450	No	No	55283	55732	BAC 11		0.964	bac,11.1
comp145179_c0_seq1_m.14002		internal	462	474	No	No	57263	57827	BAC 11		0.977	bac,11.2
comp15591_c0_seq1_m.8403		5prime_partial	528	688	No	Yes	58091	75388	BAC 11		0.935	bac,11.3
comp112557_c0_seq1_m.13205		3prime_partial	369	33	No	No	94296	94328	BAC 11		1	bac,11.4
comp8527_c1_seq1_m.33895		5prime_partial	630	633	No	No	150476	151099	BAC 11		0.809	bac,11.5
comp14890_c0_seq4_m.26838		3prime_partial	990	992	No	No	178776	179748	BAC 11	BAC4,21, BAC8, BAC2	0.804	bac,11.6
comp14890_c0_seq1_m.26831		3prime_partial	1227	950	No	No	178818	179748	BAC 11	BAC4,21, BAC8	0.798	bac,11.6
comp14890_c0_seq1_m.26833		complete	399	187	No	No	178818	179003	BAC 11	BAC4,21, BAC8	0.877	bac,11.6
comp14890_c0_seq2_m.26834		3prime_partial	1659	950	No	No	178818	179748	BAC 11	BAC4,21, BAC8	0.798	bac,11.6
comp14890_c0_seq2_m.26835		complete	399	187	No	No	178818	179003	BAC 11	BAC4,21, BAC8	0.877	bac,11.6
comp14890_c0_seq3_m.26836		3prime_partial	1227	960	No	No	178818	179748	BAC 11	BAC4,21, BAC8	0.798	bac,11.6
comp14890_c0_seq3_m.26837		complete	399	187	No	No	178818	179003	BAC 11	BAC4,21, BAC8	0.877	bac,11.6
comp11153_c0_seq1_m.5272		5prime_partial	393	1996	maybe	Edge	183470	202882	BAC 11		0.875889	bac,11.6
comp14760_c0_seq1_m.7808	NA	complete	399	398	Yes	No	198595	198991	BAC 11		0.965	bac,11.6
comp14760_c0_seq1_m.7807	NA	complete	1017	1017	Yes	No	199576	200591	BAC 11		0.957	bac,11.6
comp7553_c0_seq1_m.19007		internal	381	359	No	No	200668	201011	BAC 11		0.894	bac,11.6
comp7553_c0_seq2_m.19009		internal	339	285	No	No	200668	201011	BAC 11		0.9585	bac,11.6
comp7553_c0_seq1_m.19008		3prime_partial	309	256	No	No	200757	201012	BAC 11		0.93	bac,11.6
comp2479_c0_seq1_m.501		internal	342	320	No	No	200991	201310	BAC 11		0.947	bac,11.7
comp12522_c0_seq1_m.6223		5prime_partial	675	89	No	No	201344	201432	BAC 11		0.966	bac,11.8
comp173291_c0_seq1_m.14465		internal	303	300	No	No	204738	205037	BAC 11		0.967	bac,11.9
comp173291_c0_seq1_m.14464		internal	303	300	No	No	204739	205038	BAC 11		0.967	bac,11.9
comp141720_c0_seq1_m.13875		internal	309	306	No	No	207269	207574	BAC 11		0.971	bac,11.10
comp18398_c0_seq1_m.33389		complete	4113	1935	No	No	69000	71198	BAC 2	Cons 1,9	0.910667	bac3.8
comp18398_c0_seq2_m.33390		complete	4011	1935	No	No	69000	71198	BAC 2	Cons 1,9	0.910667	bac3.8
comp14795_c0_seq2_m.26238	NA	complete	375	680	Yes	No	75239	83365	BAC 2	Cons 1,9	0.9348	bac3.9
comp14795_c0_seq1_m.26236		complete	1050	865	No	No	75239	83469	BAC 2	Cons 1,9	0.921833	bac3.9
comp16039_c1_seq1_m.35112		5prime_partial	1995	520	No	No	83365	83469	BAC 2		0.89	bac3.10
comp14795_c0_seq1_m.26237		complete	378	105	No	No	83365	83469	BAC 2	Cons 1,9	0.905	bac3.10
comp14890_c0_seq4_m.26838		3prime_partial	990	173	No	No	83365	83469	BAC 2	BAC4,21, BAC11, BAC2	0.838	bac3.10
comp17331_c1_seq7_m.25798		5prime_partial	336	150	No	No	91537	91882	BAC 2	Cons 1,9	0.9395	bac3.11
comp17331_c1_seq8_m.25799		5prime_partial	336	150	No	No	91537	91882	BAC 2	Cons 1,9	0.9395	bac3.11
comp6556_c0_seq1_m.2385		complete	798	28	No	No	92213	92240	BAC 2		1	bac3.12
comp18838_c0_seq1_m.19132		complete	2292	99	No	No	99572	99670	BAC 2	BAC4,21, BAC1,9	0.899	bac3.13
comp18838_c0_seq2_m.19133		complete	2292	99	No	No	99572	99670	BAC 2	BAC4,21, BAC1,9	0.899	bac3.13
comp15295_c0_seq2_m.20099	NA	complete	321	316	Yes	No	108609	110043	BAC 2		0.988667	bac3.14	Multuiple genes
comp18944_c0_seq1_m.33542		complete	2502	114	No	No	108621	108733	BAC 2		0.86	bac3.14
comp18944_c0_seq2_m.33543		complete	2361	399	No	No	108621	109548	BAC 2		0.844	bac3.14
comp18944_c0_seq4_m.33545		complete	2214	114	No	No	108621	108733	BAC 2		0.86	bac3.14
comp18944_c0_seq5_m.33546		complete	2073	399	No	No	108621	109548	BAC 2		0.844	bac3.14
comp18944_c0_seq7_m.33548		5prime_partial	2097	114	No	No	108621	108733	BAC 2		0.86	bac3.14
comp18944_c0_seq8_m.33549		5prime_partial	1956	399	No	No	108621	109548	BAC 2		0.8355	bac3.14
comp18944_c0_seq3_m.33544		complete	2337	285	No	No	109278	109548	BAC 2		0.828	bac3.14
comp18944_c0_seq6_m.33547		complete	2049	285	No	No	109278	109548	BAC 2		0.828	bac3.14
comp18944_c0_seq9_m.33550		5prime_partial	1932	285	No	No	109278	109548	BAC 2		0.811	bac3.14
comp16039_c1_seq1_m.35113		complete	375	304	No	No	139082	139385	BAC 2	Cons 1,9	0.878	bac3.15
comp145889_c0_seq1_m.14028		internal	618	534	No	No	2044	2575	BAC 3	Cons 12,20	0.74	bac3.1
comp19022_c0_seq38_m.38441	NA	complete	1194	1197	Yes	No	23387	24583	BAC 3		0.971	bac3.2
comp19022_c0_seq2_m.38390		5prime_partial	1218	1198	No	No	23663	24921	BAC 3		0.9775	bac3.2
comp19022_c0_seq23_m.38421		5prime_partial	918	921	No	No	23663	24583	BAC 3		0.973	bac3.2
comp19022_c0_seq24_m.38425		5prime_partial	1218	895	No	No	23663	24921	BAC 3		0.9775	bac3.2
comp19022_c0_seq25_m.38430		5prime_partial	918	921	No	No	23663	24583	BAC 3		0.973	bac3.2
comp19022_c0_seq26_m.38434		5prime_partial	1218	1198	No	No	23663	24921	BAC 3		0.9775	bac3.2
comp19022_c0_seq3_m.38396		5prime_partial	918	921	No	No	23663	24583	BAC 3		0.973	bac3.2
comp19022_c0_seq34_m.38436		5prime_partial	918	921	No	No	23663	24583	BAC 3		0.973	bac3.2
comp19022_c0_seq35_m.38439		5prime_partial	1218	1198	Maybe	No	23663	24921	BAC 3		0.9775	bac3.2
comp19022_c0_seq4_m.38402		5prime_partial	918	921	No	No	23663	24583	BAC 3		0.973	bac3.2
comp19022_c0_seq40_m.38448		5prime_partial	918	921	No	No	23663	24583	BAC 3		0.973	bac3.2
comp19022_c0_seq41_m.38450		5prime_partial	1344	1359	No	No	23663	25082	BAC 3		0.9775	bac3.2
comp19022_c0_seq5_m.38406		5prime_partial	1218	1198	Maybe	No	23663	24921	BAC 3		0.9775	bac3.2
comp19022_c0_seq6_m.38410		5prime_partial	1218	1198	Maybe	No	23663	24921	BAC 3		0.9775	bac3.2
comp19022_c0_seq7_m.38415		5prime_partial	918	921	No	No	23663	24583	BAC 3		0.973	bac3.2
comp19022_c0_seq9_m.38419		5prime_partial	1218	1198	No	No	23663	24921	BAC 3		0.9775	bac3.2
comp19022_c0_seq23_m.38423		complete	369	334	Maybe	No	24588	24921	BAC 3		0.988	bac3.2
comp19022_c0_seq3_m.38399	NA	complete	369	334	Maybe	No	24588	24921	BAC 3		0.988	bac3.2
comp19022_c0_seq34_m.38438		complete	369	334	Maybe	No	24588	24921	BAC 3		0.988	bac3.2
comp19022_c0_seq38_m.38447		complete	369	334	Maybe	No	24588	24921	BAC 3		0.988	bac3.2
comp19022_c0_seq4_m.38404		complete	369	334	Maybe	No	24588	24921	BAC 3		0.988	bac3.2
comp19022_c0_seq40_m.38449	NA	complete	495	495	Yes	No	24588	25082	BAC 3		0.986	bac3.2
comp19022_c0_seq7_m.38416		complete	369	334	Maybe	No	24588	24921	BAC 3		0.988	bac3.2
comp11411_c0_seq3_m.26668	NA	complete	792	792	Yes	No	25175	25966	BAC 3		0.977	bac3.2
comp19022_c0_seq25_m.38431		complete	369	334	Maybe	No	25175	25966	BAC 3		0.988	bac3.2
comp19022_c0_seq20_m.38461	NA	complete	2247	2220	Yes	No	26231	28811	BAC 3		0.9742	bac3.3
comp19022_c0_seq22_m.38466	NA	complete	2247	2220	Yes	No	26231	28811	BAC 3		0.9742	bac3.3
comp19022_c0_seq33_m.38473	NA	complete	2211	2222	Yes	No	26231	28813	BAC 3		0.9738	bac3.3
comp19022_c0_seq39_m.38475	NA	complete	1362	1369	Yes	No	26231	27871	BAC 3		0.97325	bac3.3
comp19022_c0_seq45_m.38477	NA	complete	897	899	Yes	No	26231	27217	BAC 3		0.976	bac3.3
comp19022_c0_seq17_m.38451	NA	complete	1170	1175	Yes	No	26513	27871	BAC 3		0.968333	bac3.3
comp19022_c0_seq18_m.38455	NA	complete	2055	2026	Yes	No	26513	28811	BAC 3		0.97075	bac3.3
comp19022_c0_seq19_m.38459	NA	complete	1170	1175	Yes	No	26513	27871	BAC 3		0.968333	bac3.3
comp19022_c0_seq2_m.38391	NA	complete	1170	1175	Yes	No	26513	27871	BAC 3		0.968333	bac3.3
comp19022_c0_seq21_m.38464	NA	complete	2055	2026	Yes	No	26513	28811	BAC 3		0.97075	bac3.3
comp19022_c0_seq23_m.38420	NA	complete	1170	1175	Yes	No	26513	27871	BAC 3		0.968333	bac3.3
comp19022_c0_seq24_m.38426	NA	complete	1170	1175	Yes	No	26513	27871	BAC 3		0.968333	bac3.3
comp19022_c0_seq25_m.38429	NA	complete	2019	2028	Yes	No	26513	28813	BAC 3		0.97025	bac3.3
comp19022_c0_seq26_m.38433	NA	complete	2019	2028	Yes	No	26513	28813	BAC 3		0.97025	bac3.3
comp19022_c0_seq3_m.38395		complete	2055	2026	Maybe	No	26513	28811	BAC 3		0.97075	bac3.3
comp19022_c0_seq31_m.38468	NA	complete	1170	1175	Yes	No	26513	27871	BAC 3		0.968333	bac3.3
comp19022_c0_seq32_m.38471	NA	complete	2019	2028	Yes	No	26513	28813	BAC 3		0.97025	bac3.3
comp19022_c0_seq34_m.38437	NA	complete	705	705	Yes	No	26513	27217	BAC 3		0.965	bac3.3
comp19022_c0_seq35_m.38440	NA	complete	705	705	Yes	No	26513	27217	BAC 3		0.965	bac3.3
comp19022_c0_seq38_m.38442	NA	complete	1170	1175	Yes	No	26513	27871	BAC 3		0.968333	bac3.3
comp19022_c0_seq4_m.38401	NA	complete	1170	1175	Yes	No	26513	27871	BAC 3		0.968333	bac3.3
comp19022_c0_seq43_m.38476	NA	complete	705	705	Yes	No	26513	27217	BAC 3		0.965	bac3.3
comp19022_c0_seq5_m.38405		complete	2055	2026	Maybe	No	26513	28811	BAC 3		0.97075	bac3.3
comp19022_c0_seq6_m.38411	NA	complete	1170	1175	Yes	No	26513	27871	BAC 3		0.968333	bac3.3
comp19022_c0_seq7_m.38413		complete	2055	2026	Maybe	No	26513	28811	BAC 3		0.97075	bac3.3
comp19022_c0_seq9_m.38417		complete	2055	2026	Maybe	No	26513	28811	BAC 3		0.97075	bac3.3
comp19022_c0_seq17_m.38454		complete	651	613	Maybe	No	28200	28811	BAC 3		0.984	bac3.4
comp19022_c0_seq19_m.38460		complete	651	613	Maybe	No	28200	28811	BAC 3		0.984	bac3.4
comp19022_c0_seq2_m.38394		complete	651	613	Maybe	No	28200	28811	BAC 3		0.984	bac3.4
comp19022_c0_seq23_m.38422	NA	complete	615	615	Yes	No	28200	28813	BAC 3		0.98	bac3.4
comp19022_c0_seq24_m.38427	NA	complete	615	615	Yes	No	28200	28813	BAC 3		0.98	bac3.4
comp19022_c0_seq31_m.38469	NA	complete	615	615	Yes	No	28200	28813	BAC 3		0.98	bac3.4
comp19022_c0_seq38_m.38446		complete	651	613	Maybe	No	28200	28811	BAC 3		0.984	bac3.4
comp19022_c0_seq4_m.38403		complete	651	613	Maybe	No	28200	28811	BAC 3		0.984	bac3.4
comp19022_c0_seq6_m.38412		complete	651	613	Maybe	No	28200	28811	BAC 3		0.984	bac3.4
comp19022_c0_seq23_m.38424		5prime_partial	315	315	No	No	28545	28858	BAC 3		0.975	bac3.5
comp19022_c0_seq24_m.38428		5prime_partial	315	315	No	No	28545	28858	BAC 3		0.975	bac3.5
comp19022_c0_seq25_m.38432		5prime_partial	315	315	No	No	28545	28858	BAC 3		0.975	bac3.5
comp19022_c0_seq26_m.38435		5prime_partial	315	315	No	No	28545	28858	BAC 3		0.975	bac3.5
comp19022_c0_seq31_m.38470		5prime_partial	315	315	No	No	28545	28858	BAC 3		0.975	bac3.5
comp19022_c0_seq32_m.38472		5prime_partial	315	315	No	No	28545	28858	BAC 3		0.975	bac3.5
comp19022_c0_seq33_m.38474		5prime_partial	315	315	No	No	28545	28858	BAC 3		0.975	bac3.5
comp955_c0_seq1_m.36205	sut1_styha ame: full=high affinity sulfate transporter 1	complete	660	1119	Yes	No	29680	42243	BAC 3		0.9452	bac3.6
comp12206_c0_seq3_m.17014		complete	723	187	No	No	54424	54610	BAC 3	Cons 7,13,14,23,24	0.92	bac3.7
comp15980_c0_seq1_m.34239	p2c10_arath ame: full=probable protein phosphatase 2c 10 short= 2c10	complete	843	1163	Yes	No	68434	70944	BAC 5	Cons 12,20	0.987143	bac6.9
comp19090_c0_seq1_m.10463		complete	1521	49	No	No	114175	114223	BAC 5	Cons 12,20	1	bac6.10
comp4425_c0_seq1_m.1148		5prime_partial	2124	57	No	No	114222	114278	BAC 5	Cons 12,20	0.982	bac6.11
comp479_c0_seq1_m.136		internal	474	462	No	No	116389	116850	BAC 5	Cons 7,13,14,23,24, BAC12,20	0.918	bac6.12
comp111350_c0_seq1_m.13117		5prime_partial	591	591	No	No	117838	118428	BAC 5	Cons 12,20	0.929	bac6.13
comp1371_c0_seq1_m.365		internal	429	426	No	No	117838	118428	BAC 5	Cons 12,20	0.911	bac6.13
comp179462_c0_seq1_m.14529		internal	459	389	No	No	123888	124267	BAC 5	, BAC6	0.897	bac6.14
comp806_c0_seq1_m.223		5prime_partial	432	426	No	No	136591	137016	BAC 5	Cons 12,20	0.859	bac6.15
comp441_c0_seq1_m.124		internal	900	670	No	No	136879	137547	BAC 5	Cons 7,13,14,23,24, BAC12,20	0.897	bac6.15
comp121935_c0_seq1_m.13403		complete	891	177	No	No	63704	63879	BAC 6		0.876	bac6.1
comp436_c0_seq1_m.121		internal	354	325	No	No	78377	79982	BAC 6		0.9485	bac6.2
comp179462_c0_seq1_m.14529		internal	459	321	No	No	83603	83919	BAC 6	, BAC5	0.907	bac6.3
comp80468_c0_seq1_m.12302		5prime_partial	531	531	No	No	85599	86129	BAC 6		1	bac6.4
comp6964_c1_seq1_m.25848		5prime_partial	720	351	No	No	90069	90419	BAC 6		0.909	bac6.5
comp13980_c0_seq1_m.30990		complete	1233	93	No	No	91154	91246	BAC 6		0.892	bac6.6
comp13980_c0_seq2_m.30992		complete	1389	93	No	No	91154	91246	BAC 6		0.892	bac6.6
comp148443_c0_seq1_m.14082		5prime_partial	474	405	No	No	91977	92380	BAC 6		0.933	bac6.7
comp216191_c0_seq1_m.14914		internal	351	347	No	No	92570	92916	BAC 6		0.893	bac6.8
comp18928_c0_seq1_m.24972		complete	3324	2024	No	No	1	3979	BAC 8		0.99175	bac8.1
comp18928_c0_seq3_m.24974		complete	2790	1475	No	No	1	2403	BAC 8		0.996857	bac8.1
comp3945_c0_seq1_m.18966		5prime_partial	1932	131	No	No	8254	8384	BAC 8		0.863	bac8.2
comp15555_c0_seq1_m.8373		complete	447	395	No	Yes	15133	131662	BAC 8		0.98	bac8.3
comp19026_c0_seq1_m.18288		5prime_partial	2304	1843	No	No	16842	26241	BAC 8		0.910714	bac8.4
comp19026_c0_seq3_m.18291		5prime_partial	2256	1509	No	No	16842	26241	BAC 8		0.913333	bac8.4
comp18206_c0_seq1_m.23424		3prime_partial	996	145	No	No	16844	16988	BAC 8		0.91	bac8.4
comp6072_c0_seq1_m.30349		5prime_partial	378	137	No	No	16844	16980	BAC 8		0.92	bac8.4
comp19026_c0_seq3_m.18292		complete	393	334	No	No	19412	19745	BAC 8		0.901	bac8.4
comp19026_c0_seq11_m.18297		internal	1488	434	No	No	19475	26241	BAC 8		0.95	bac8.4
comp19026_c0_seq17_m.18298		5prime_partial	1155	550	No	No	19475	26241	BAC 8		0.94075	bac8.4
comp19026_c0_seq5_m.18294		5prime_partial	1203	550	No	No	19475	26241	BAC 8		0.94075	bac8.4
comp19026_c0_seq7_m.18295		internal	1539	434	No	No	19475	26241	BAC 8		0.95	bac8.4
comp19026_c0_seq9_m.18296		internal	1509	434	No	No	19475	26241	BAC 8		0.95	bac8.4
comp16592_c0_seq1_m.9056"	pect1_arath ame: full=ethanolamine-phosphate cytidylyltransferase ame: full=ctp:phosphoethanolamine cytidylyltransferase ame: full=phosphorylethanolamine cytidylyltransferase 1	complete	1281	1297	Yes	No	32876	37652	BAC 8		0.993333	bac8.5
comp16592_c0_seq1_m.9057"	pect1_arath ame: full=ethanolamine-phosphate cytidylyltransferase ame: full=ctp:phosphoethanolamine cytidylyltransferase ame: full=phosphorylethanolamine cytidylyltransferase 1	complete	453	453	Yes	No	36399	37550	BAC 8		0.9905	bac8.6
comp16035_c0_seq1_m.20372		5prime_partial	1713	1729	Maybe	No	42929	45196	BAC 8		0.967	bac8.7
comp16035_c0_seq2_m.20374		5prime_partial	819	803	No	No	42929	44270	BAC 8		0.96725	bac8.7
comp16035_c0_seq2_m.20373"	spea_bachd ame: full=arginine decarboxylase	complete	825	823	Yes	No	44374	45196	BAC 8		0.99	bac8.8
comp14504_c0_seq1_m.39143"	mbd2_arath ame: full=methyl- -binding domain-containing protein 2 short= 2 short=mbd02 ame: full=methyl- -binding protein mbd2	complete	957	965	Yes	No	46612	50332	BAC 8		0.995	bac8.9
comp13069_c0_seq1_m.6639	NA	complete	660	662	Yes	No	53526	55005	BAC 8		0.992667	bac8.10
comp1298_c0_seq1_m.20776		5prime_partial	582	220	No	No	57900	58119	BAC 8		0.914	bac8.11
comp17146_c0_seq1_m.21427"	pyrd_orysj ame: full=dihydroorotate dehydrogenase mitochondrial short=dhodehase ame: full=dihydroorotate oxidase flags: precursor	complete	918	943	Yes	No	68583	73932	BAC 8		0.994	bac8.12
comp13781_c0_seq1_m.7115"	mt21a_human ame: full=protein n-lysine methyltransferase mettl21a ame: full=hspa lysine methyltransferase ame: full=hspa-kmt ame: full=hepatocellular carcinoma-associated antigen 557b ame: full=methyltransferase-like protein 21a	complete	837	841	Yes	No	79040	82011	BAC 8		0.9954	bac8.13
comp13628_c0_seq1_m.7014		complete	1119	1055	Maybe	No	83920	89037	BAC 8	, Cons 7,13,14,23,24	0.99275	bac8.14
comp14890_c0_seq4_m.26838		3prime_partial	990	1014	No	No	94083	95096	BAC 8	BAC4,21, BAC11, BAC2	0.903	bac8.15
comp14890_c0_seq1_m.26831		3prime_partial	1227	972	No	No	94125	95096	BAC 8	BAC4m21, BAC11	0.901	bac8.15
comp14890_c0_seq1_m.26833		complete	399	190	No	No	94125	94314	BAC 8	BAC4m21, BAC11	0.947	bac8.15
comp14890_c0_seq2_m.26834		3prime_partial	1659	972	No	No	94125	95096	BAC 8	BAC4m21, BAC11	0.901	bac8.15
comp14890_c0_seq2_m.26835		complete	399	190	No	No	94125	94314	BAC 8	BAC4m21, BAC11	0.947	bac8.15
comp14890_c0_seq3_m.26836		3prime_partial	1227	972	No	No	94125	95096	BAC 8	BAC4m21, BAC11	0.901	bac8.15
comp14890_c0_seq3_m.26837		complete	399	190	No	No	94125	94314	BAC 8	BAC4m21, BAC11	0.947	bac8.15
comp111310_c0_seq1_m.13114		3prime_partial	588	595	No	No	110171	110755	BAC 8		0.85	bac8.16
comp129367_c0_seq1_m.13676		5prime_partial	777	777	No	No	110753	111529	BAC 8		0.997	bac8.17
comp47366_c0_seq1_m.11499"	str8_arath ame: full=rhodanese-like domain-containing protein chloroplastic ame: full=sulfurtransferase 8 short= tr8 flags: precursor	complete	1221	1227	Yes	No	113175	114762	BAC 8		0.999667	bac8.18
comp12210_c0_seq1_m.25673		5prime_partial	507	512	No	No	119446	122694	BAC 8		0.979	bac8.19
comp12210_c0_seq2_m.25674		5prime_partial	303	307	No	No	121370	122694	BAC 8		0.9735	bac8.19
comp12210_c1_seq1_m.25672		3prime_partial	828	825	No	No	122680	123504	BAC 8		0.989	bac8.20
comp10282_c0_seq1_m.37420		complete	1254	579	No	No	137056	145183	BAC 8		0.9978	bac8.20
comp9763_c0_seq1_m.19924		internal	1107	803	No	No	138465	139267	BAC 8		0.981	bac8.20
comp9763_c0_seq2_m.19925		internal	1104	807	No	No	138465	139267	BAC 8		0.896	bac8.20
comp12614_c0_seq1_m.38823		internal	327	324	No	No	139343	139666	BAC 8		0.991	bac8.20
comp12614_c1_seq1_m.38824		5prime_partial	1980	1980	No	No	139655	141634	BAC 8		0.998	bac8.20
comp10282_c0_seq1_m.37421		complete	300	277	Maybe	No	143178	145183	BAC 8		0.996333	bac8.20
comp14795_c0_seq2_m.26238	NA	complete	375	547	Yes	Yes	18559	34080	Cons 1,9	BAC 2	0.8975	1,9.1	inerrupted by other
comp18398_c0_seq1_m.33389		complete	4113	1935	No	No	26929	29127	Cons 1,9	BAC 2	0.910667	1,9.2
comp18398_c0_seq2_m.33390		complete	4011	1935	No	No	26929	29127	Cons 1,9	BAC 2	0.910667	1,9.2
comp14795_c0_seq1_m.26236		complete	1050	952	Maybe	No	33168	41398	Cons 1,9	BAC 2	0.929714	1,9.3
comp14795_c0_seq1_m.26237		complete	378	324	Maybe	No	41076	41398	Cons 1,9	BAC 2	0.925	1,9.3
comp17331_c1_seq7_m.25798		5prime_partial	336	150	No	No	49466	49558	Cons 1,9	BAC 2	0.9395	1,9.4
comp17331_c1_seq8_m.25799		5prime_partial	336	150	No	No	49466	49811	Cons 1,9	BAC 2	0.9395	1,9.4
comp6556_c0_seq1_m.2385		complete	798	28	No	No	50142	50169	Cons 1,9		1	1,9.5
comp18838_c0_seq1_m.19132		complete	2292	99	No	No	57501	57599	Cons 1,9	BAC4,21, BAC2	0.899	1,9.6
comp18838_c0_seq2_m.19133		complete	2292	99	No	No	57501	57599	Cons 1,9	BAC4,21, BAC2	0.899	1,9.6
comp16039_c1_seq1_m.35112		5prime_partial	1995	520	No	No	97016	97534	Cons 1,9	Cons 12,20	0.89	1,9.7
comp16039_c1_seq1_m.35113		complete	375	304	No	No	97016	97319	Cons 1,9	BAC 2	0.878	1,9.7
comp806_c0_seq1_m.223		5prime_partial	432	851	No	Yes	1693	29167	Cons 12,20	BAC 5	0.865	bac12,20.0	1.5 hits
comp441_c0_seq1_m.124		internal	900	1797	No	Yes	1981	28879	Cons 12,20	Cons 7,13,14,23,24, BAC5	0.8815	bac12,20.0
comp390_c1_seq1_m.18432		internal	300	590	No	Yes	2982	27878	Cons 12,20		0.898	bac12,20.0
comp2335_c1_seq1_m.20792		internal	495	664	No	No	3309	27551	Cons 12,20	Cons 7,13,14,23,24	0.914	bac12,20.0
comp392_c0_seq1_m.108		internal	441	769	No	Yes	4617	26114	Cons 12,20		0.862	bac12,20.0
comp7074_c0_seq1_m.2715		5prime_partial	1065	2029	No	Yes	5042	25682	Cons 12,20		0.817667	bac12,20.0
comp131711_c0_seq1_m.13725		internal	321	76	No	No	23357	23432	Cons 12,20		0.947	bac12,20.1
comp2335_c0_seq1_m.20790		5prime_partial	669	665	No	No	26082	26741	Cons 12,20		0.839	bac12,20.2
comp179462_c0_seq1_m.14529		internal	459	389	No	No	41495	41874	Cons 12,20	BAC5, BAC6	0.9	bac12,20.3
comp111350_c0_seq1_m.13117		5prime_partial	591	591	No	No	47333	47923	Cons 12,20	BAC 5	0.929	bac12,20.4
comp1371_c0_seq1_m.365		internal	429	426	No	No	48224	48643	Cons 12,20	, BAC8	0.911	bac12,20.5
comp479_c0_seq1_m.136		internal	474	462	No	No	48911	49372	Cons 12,20	Cons 7,13,14,23,24, BAC5	0.918	bac12,20.6
comp4425_c0_seq1_m.1148		5prime_partial	2124	57	No	No	51484	51540	Cons 12,20	Cons 12,20	0.982	bac12,20.7
comp19090_c0_seq1_m.10463		complete	1521	49	No	No	51539	51587	Cons 12,20	BAC 5	1	bac12,20.8
comp15980_c0_seq1_m.34239	p2c10_arath ame: full=probable protein phosphatase 2c 10 short= 2c10	complete	843	858	Yes	No	94831	97341	Cons 12,20	BAC 5	0.989	bac12,20.9
comp15980_c0_seq2_m.34240"	p2c10_arath ame: full=probable protein phosphatase 2c 10 short= 2c10	complete	300	305	Yes	No	94831	95247	Cons 12,20		0.9825	bac12,20.9
comp78988_c0_seq1_m.12259		5prime_partial	705	416	No	No	163455	163863	Cons 12,20		0.913	bac12,20.10
comp3761_c0_seq1_m.749		internal	390	387	No	No	175708	176094	Cons 12,20	Cons 7,13,14,23,24	0.91	bac12,20.11
comp13740_c0_seq1_m.7091		5prime_partial	666	758	No	Yes	177031	178246	Cons 12,20	BAC 5	0.8825	bac12,20.12
comp11257_c1_seq1_m.30715		5prime_partial	804	309	No	Yes	183789	183819	Cons 12,20		1	bac12,20.13
comp11183_c0_seq1_m.33168		complete	3213	55	No	No	186875	186929	Cons 12,20		1	bac12,20.14
comp11183_c0_seq2_m.33173		complete	3213	55	No	No	186875	186929	Cons 12,20		1	bac12,20.14
comp135043_c0_seq1_m.13752		internal	606	588	No	No	195629	196216	Cons 12,20	Cons 4,21	0.932	bac12,20.15
comp145125_c0_seq1_m.14001		internal	471	468	No	No	195995	196462	Cons 12,20		0.906	bac12,20.15
comp10635_c0_seq2_m.19526		internal	402	399	No	No	196737	197135	Cons 12,20		0.945	bac12,20.16
comp117085_c0_seq1_m.13340		internal	375	372	No	No	198405	198775	Cons 12,20	Cons 4,21	0.906	bac12,20.17
comp161393_c0_seq1_m.14188		internal	348	338	No	No	198766	199103	Cons 12,20		0.914	bac12,20.18
comp160368_c0_seq1_m.14182		internal	483	479	No	No	199195	199673	Cons 12,20	Cons 1,9	0.906	bac12,20.19
comp8446_c1_seq1_m.26396		internal	336	326	No	No	199756	200081	Cons 12,20	Cons 4,21	0.917	bac12,20.20
comp8446_c0_seq1_m.26395		internal	336	326	No	No	200077	200401	Cons 12,20		0.877	bac12,20.21
comp145889_c0_seq1_m.14028		internal	618	615	No	No	204430	205044	Cons 12,20	BAC 3	0.959	bac12,20.22
comp106123_c0_seq1_m.13048		internal	684	661	No	No	205050	205710	Cons 12,20		0.938	bac12,20.23
comp10146_c0_seq1_m.27687		complete	594	342	No	No	214039	214378	Cons 12,20		0.95	bac12,20.24
comp12884_c0_seq1_m.6489		complete	420	127	No	No	214517	214643	Cons 12,20		0.961	bac12,20.25
comp14890_c0_seq4_m.26838		3prime_partial	990	1025	No	No	18101	19113	Cons 4,21	BAC8,BAC2, BAC11	0.774	bac4,21.1
comp14890_c0_seq1_m.26831		3prime_partial	1227	983	No	No	18143	19113	Cons 4,21	BAC8, BAC11	0.767	bac4,21.1
comp14890_c0_seq1_m.26833		complete	399	189	No	No	18143	18330	Cons 4,21	BAC8, BAC11	0.852	bac4,21.2
comp14890_c0_seq2_m.26834		3prime_partial	1659	983	No	No	18143	19113	Cons 4,21	BAC8, BAC11	0.767	bac4,21.2
comp14890_c0_seq2_m.26835		complete	399	189	No	No	18143	18330	Cons 4,21	BAC8, BAC11	0.852	bac4,21.2
comp14890_c0_seq3_m.26836		3prime_partial	1227	983	No	No	18143	19113	Cons 4,21	BAC8, BAC11	0.767	bac4,21.2
comp14890_c0_seq3_m.26837		complete	399	189	No	No	18143	18330	Cons 4,21	BAC8, BAC11	0.852	bac4,21.2
comp117085_c0_seq1_m.13340		internal	375	358	No	No	48274	48629	Cons 4,21	Cons 12,20	0.818	bac4,21.3
comp8446_c1_seq1_m.26396		internal	336	319	No	No	49614	49931	Cons 4,21	Cons 12,20	0.865	bac4,21.4
comp19038_c0_seq1_m.10449	acc1_arath ame: full=acetyl- carboxylase 1 short= 1 ame: full=protein embryo defective 22 ame: full=protein gurke ame: full=protein pasticcino 3 includes: ame: full=biotin carboxylase	complete	4902	5025	Yes	No	75295	86025	Cons 4,21		0.979897	bac4,21.5
comp19038_c0_seq1_m.10450	acc1_arath ame: full=acetyl- carboxylase 1 short= 1 ame: full=protein embryo defective 22 ame: full=protein gurke ame: full=protein pasticcino 3 includes: ame: full=biotin carboxylase	complete	1374	1368	Yes	No	86006	87372	Cons 4,21		0.978	bac4,21.6
comp19038_c0_seq1_m.10451		complete	543	488	No	No	87386	87873	Cons 4,21		0.961	bac4,21.7
comp18911_c0_seq5_m.15435		complete	723	687	No	No	89675	91476	Cons 4,21		0.9208	bac4,21.8
comp18911_c0_seq1_m.15428		complete	711	647	No	No	89715	91476	Cons 4,21		0.923	bac4,21.8
comp18911_c0_seq2_m.15422		complete	969	36	No	No	89715	89750	Cons 4,21		0.944	bac4,21.8
comp18911_c0_seq2_m.15423		complete	711	647	No	No	89715	91476	Cons 4,21		0.923	bac4,21.8
comp18911_c0_seq2_m.15425		complete	522	347	No	No	91994	92258	Cons 4,21		0.9235	bac4,21.9
comp18911_c0_seq6_m.15427		3prime_partial	306	313	No	No	92075	92648	Cons 4,21		0.992	bac4,21.9
comp18911_c0_seq6_m.15426		5prime_partial	558	212	No	No	92667	92866	Cons 4,21		0.896	bac4,21.10
comp18911_c0_seq15_m.15436		3prime_partial	372	153	No	No	95101	95241	Cons 4,21		0.85	bac4,21.11
comp11027_c0_seq1_m.29245		complete	435	382	No	No	113739	114119	Cons 4,21		0.919	bac4,21.12
comp11027_c0_seq4_m.29252		complete	435	382	No	No	113739	114119	Cons 4,21		0.919	bac4,21.12
comp135043_c0_seq1_m.13752		internal	606	598	No	No	113739	114119	Cons 4,21	Cons 12,20	0.799	bac4,21.12
comp13973_c0_seq1_m.18890		complete	552	190	No	No	115612	115792	Cons 4,21		0.826	bac4,21.13
comp13973_c0_seq3_m.18893		complete	552	190	No	No	115612	115792	Cons 4,21		0.826	bac4,21.13
comp18838_c0_seq1_m.19132		complete	2292	75	No	No	132276	132350	Cons 4,21	BAC2, BAC1,9	0.92	bac4,21.14
comp18838_c0_seq2_m.19133		complete	2292	75	No	No	132276	132350	Cons 4,21	BAC2, BAC1,9	0.92	bac4,21.14
comp94937_c0_seq1_m.12687		internal	573	311	No	No	137383	137690	Cons 4,21		0.904	bac4,21.15
comp94937_c0_seq1_m.12688		5prime_partial	477	209	No	No	137482	137690	Cons 4,21		0.967	bac4,21.15
comp94937_c0_seq1_m.12689		5prime_partial	420	182	No	No	137509	137690	Cons 4,21		0.967	bac4,21.15
comp9056_c0_seq1_m.3886		5prime_partial	651	607	No	No	9832	10847	Cons 7,13,14,23,24		0.962333	bac7,13,14,23,24.1
comp9056_c0_seq1_m.3887		3prime_partial	303	257	No	No	10591	10847	Cons 7,13,14,23,24		0.949	bac7,13,14,23,24.1
comp111519_c0_seq1_m.13130		3prime_partial	330	328	No	No	10950	13078	Cons 7,13,14,23,24		0.977333	bac7,13,14,23,24.2
comp111519_c0_seq1_m.13129		5prime_partial	369	370	No	No	10951	13121	Cons 7,13,14,23,24		0.977667	bac7,13,14,23,24.2
comp232486_c0_seq1_m.15002		internal	531	530	No	No	11598	12119	Cons 7,13,14,23,24		0.823	bac7,13,14,23,24.2
comp5901_c0_seq1_m.2037		5prime_partial	1185	953	No	No	33623	34667	Cons 7,13,14,23,24		0.99	bac7,13,14,23,24.3
comp12206_c0_seq3_m.17014		complete	723	186	No	No	38134	38319	Cons 7,13,14,23,24	BAC 3	0.935	bac7,13,14,23,24.4
comp128344_c0_seq1_m.13643		internal	591	405	No	No	103540	103941	Cons 7,13,14,23,24		0.877	bac7,13,14,23,24.5
comp479_c0_seq1_m.136		internal	474	433	No	No	116416	116846	Cons 7,13,14,23,24	BAC12,20, BAC5	0.834	bac7,13,14,23,24.6
comp1371_c0_seq1_m.365		internal	429	274	No	No	117227	117494	Cons 7,13,14,23,24	, BAC8	0.828	bac7,13,14,23,24.7
comp18842_c0_seq15_m.22575		5prime_partial	423	81	No	No	119622	119700	Cons 7,13,14,23,24		0.889	bac7,13,14,23,24.8
comp18842_c0_seq17_m.22576		5prime_partial	417	79	No	No	119622	119699	Cons 7,13,14,23,24		0.924	bac7,13,14,23,24.8
comp18842_c0_seq6_m.22571		5prime_partial	423	81	No	No	119622	119700	Cons 7,13,14,23,24		0.889	bac7,13,14,23,24.8
comp18842_c0_seq8_m.22572		5prime_partial	417	79	No	No	119622	119699	Cons 7,13,14,23,24		0.924	bac7,13,14,23,24.8
comp18842_c0_seq12_m.22574		5prime_partial	495	76	No	No	119625	119699	Cons 7,13,14,23,24		0.934	bac7,13,14,23,24.8
comp18842_c0_seq2_m.22569		5prime_partial	501	78	No	No	119625	119700	Cons 7,13,14,23,24		0.897	bac7,13,14,23,24.8
comp18842_c0_seq4_m.22570		5prime_partial	495	76	No	No	119625	119699	Cons 7,13,14,23,24		0.934	bac7,13,14,23,24.8
comp18842_c0_seq9_m.22573		5prime_partial	501	78	No	No	119625	119700	Cons 7,13,14,23,24		0.897	bac7,13,14,23,24.8
comp16909_c0_seq1_m.9239		complete	1098	38	No	No	168040	168077	Cons 7,13,14,23,24		1	bac7,13,14,23,24.9
comp17297_c0_seq2_m.16734		complete	918	110	No	No	168145	168254	Cons 7,13,14,23,24		0.945	bac7,13,14,23,24.10
comp17297_c0_seq3_m.16735		complete	678	110	No	No	168145	168254	Cons 7,13,14,23,24		0.945	bac7,13,14,23,24.11
comp15634_c0_seq1_m.25464		complete	432	249	No	No	168616	169984	Cons 7,13,14,23,24		0.961333	bac7,13,14,23,24.12
comp15634_c0_seq2_m.25466		complete	1194	249	No	No	168616	169984	Cons 7,13,14,23,24		0.961333	bac7,13,14,23,24.13
comp2335_c1_seq1_m.20792		internal	495	494	No	No	185793	186283	Cons 7,13,14,23,24	Cons 12,20	0.85	bac7,13,14,23,24.14
comp441_c0_seq1_m.124		internal	900	894	No	No	188221	189113	Cons 7,13,14,23,24	BAC12,20, BAC5	0.777	bac7,13,14,23,24.15
comp6133_c0_seq1_m.2133		complete	918	329	No	Yes	208238	208739	Cons 7,13,14,23,24		0.931333	bac7,13,14,23,24.16
comp4088_c0_seq1_m.937		complete	2493	62	No	No	208813	208874	Cons 7,13,14,23,24		0.968	bac7,13,14,23,24.17
comp16202_c0_seq1_m.8803	NA	complete	345	345	Yes	No	215548	215892	Cons 7,13,14,23,24		1	bac7,13,14,23,24.18
comp16202_c0_seq1_m.8802	NA	complete	360	360	Yes	No	216048	216406	Cons 7,13,14,23,24		0.989	bac7,13,14,23,24.19
comp12519_c4_seq1_m.33357		5prime_partial	753	753	No	No	218392	219144	Cons 7,13,14,23,24		0.994	bac7,13,14,23,24.20
comp12519_c4_seq1_m.33358		5prime_partial	486	476	No	No	219124	219599	Cons 7,13,14,23,24		0.983	bac7,13,14,23,24.21
comp12519_c4_seq1_m.33359		3prime_partial	405	392	No	No	219208	219599	Cons 7,13,14,23,24		0.987	bac7,13,14,23,24.21
comp12519_c3_seq1_m.33356	NA	complete	861	861	Yes	No	219659	220519	Cons 7,13,14,23,24		0.985	bac7,13,14,23,24.22
comp8830_c0_seq1_m.3731		5prime_partial	660	717	No	No	222858	223530	Cons 7,13,14,23,24		0.972	bac7,13,14,23,24.23
comp8830_c0_seq1_m.3732		5prime_partial	624	679	No	No	222858	223492	Cons 7,13,14,23,24		0.9715	bac7,13,14,23,24.24
comp3761_c0_seq1_m.749		internal	390	387	No	No	226187	226573	Cons 7,13,14,23,24	Cons 12,20	0.886	bac7,13,14,23,24.25
comp15809_c0_seq1_m.34724		complete	2229	110	No	No	229153	229261	Cons 7,13,14,23,24		0.882	bac7,13,14,23,24.26
comp13740_c0_seq1_m.7091		5prime_partial	666	627	No	No	238712	239334	Cons 7,13,14,23,24		0.901	bac7,13,14,23,24.27
comp6859_c0_seq1_m.2594		internal	312	123	No	No	248906	249028	Cons 7,13,14,23,24		0.829	bac7,13,14,23,24.28

## Sheet: complete, full mapping
Name	annotation	SC_PCR	ORF status	ORF length	length blasting to BAC	full length hit?	Duplicated?	contig start	contig end	contig	other contig hit	rough identity	BAC block
comp19038_c0_seq1_m.10450"	acc1_arath ame: full=acetyl- carboxylase 1 short= 1 ame: full=protein embryo defective 22 ame: full=protein gurke ame: full=protein pasticcino 3 includes: ame: full=biotin carboxylase		complete	1374	1368	Yes	No	86006	87372	Cons 4,21		0.978	bac4,21.6
comp19038_c0_seq1_m.10449"	acc1_arath ame: full=acetyl- carboxylase 1 short= 1 ame: full=protein embryo defective 22 ame: full=protein gurke ame: full=protein pasticcino 3 includes: ame: full=biotin carboxylase		complete	4902	5025	Yes	No	75295	86025	Cons 4,21		0.979897	bac4,21.5
comp16827_c0_seq1_m.24466"	fbk8_arath ame: full=f-box kelch-repeat protein at1g22040	gm2445	complete	888	888	Yes	No	6945	7412	BAC 10		0.85	bac10.1
comp14504_c0_seq1_m.39143"	mbd2_arath ame: full=methyl- -binding domain-containing protein 2 short= 2 short=mbd02 ame: full=methyl- -binding protein mbd2		complete	957	965	Yes	No	46612	50332	BAC 8		0.995	bac8.9
comp13781_c0_seq1_m.7115"	mt21a_human ame: full=protein n-lysine methyltransferase mettl21a ame: full=hspa lysine methyltransferase ame: full=hspa-kmt ame: full=hepatocellular carcinoma-associated antigen 557b ame: full=methyltransferase-like protein 21a		complete	837	841	Yes	No	79040	82011	BAC 8		0.9954	bac8.13
comp14795_c0_seq2_m.26238	NA		complete	375	547	Yes	Yes	18559	34080	Cons 1,9	BAC 2	0.8975	bac1,9.1	inerrupted by other
comp14795_c0_seq2_m.26238	NA		complete	375	680	Yes	No	75239	83365	BAC 2	Cons 1,9	0.9348	bac3.9
comp14760_c0_seq1_m.7807	NA		complete	1017	1017	Yes	No	199576	200591	BAC 11		0.957	bac,11.6
comp14760_c0_seq1_m.7808	NA		complete	399	398	Yes	No	198595	198991	BAC 11		0.965	bac,11.6
comp19022_c0_seq34_m.38437	NA		complete	705	705	Yes	No	26513	27217	BAC 3		0.965	bac3.3
comp19022_c0_seq35_m.38440	NA		complete	705	705	Yes	No	26513	27217	BAC 3		0.965	bac3.3
comp19022_c0_seq43_m.38476	NA		complete	705	705	Yes	No	26513	27217	BAC 3		0.965	bac3.3
comp19022_c0_seq17_m.38451	NA		complete	1170	1175	Yes	No	26513	27871	BAC 3		0.968333	bac3.3
comp19022_c0_seq19_m.38459	NA		complete	1170	1175	Yes	No	26513	27871	BAC 3		0.968333	bac3.3
comp19022_c0_seq2_m.38391	NA		complete	1170	1175	Yes	No	26513	27871	BAC 3		0.968333	bac3.3
comp19022_c0_seq23_m.38420	NA		complete	1170	1175	Yes	No	26513	27871	BAC 3		0.968333	bac3.3
comp19022_c0_seq24_m.38426	NA		complete	1170	1175	Yes	No	26513	27871	BAC 3		0.968333	bac3.3
comp19022_c0_seq31_m.38468	NA		complete	1170	1175	Yes	No	26513	27871	BAC 3		0.968333	bac3.3
comp19022_c0_seq38_m.38442	NA		complete	1170	1175	Yes	No	26513	27871	BAC 3		0.968333	bac3.3
comp19022_c0_seq4_m.38401	NA		complete	1170	1175	Yes	No	26513	27871	BAC 3		0.968333	bac3.3
comp19022_c0_seq6_m.38411	NA		complete	1170	1175	Yes	No	26513	27871	BAC 3		0.968333	bac3.3
comp19022_c0_seq25_m.38429	NA		complete	2019	2028	Yes	No	26513	28813	BAC 3		0.97025	bac3.3
comp19022_c0_seq26_m.38433	NA		complete	2019	2028	Yes	No	26513	28813	BAC 3		0.97025	bac3.3
comp19022_c0_seq32_m.38471	NA		complete	2019	2028	Yes	No	26513	28813	BAC 3		0.97025	bac3.3
comp19022_c0_seq18_m.38455	NA		complete	2055	2026	Yes	No	26513	28811	BAC 3		0.97075	bac3.3
comp19022_c0_seq21_m.38464	NA		complete	2055	2026	Yes	No	26513	28811	BAC 3		0.97075	bac3.3
comp19022_c0_seq38_m.38441	NA		complete	1194	1197	Yes	No	23387	24583	BAC 3		0.971	bac3.2
comp19022_c0_seq39_m.38475	NA		complete	1362	1369	Yes	No	26231	27871	BAC 3		0.97325	bac3.3
comp19022_c0_seq33_m.38473	NA		complete	2211	2222	Yes	No	26231	28813	BAC 3		0.9738	bac3.3
comp19022_c0_seq20_m.38461	NA		complete	2247	2220	Yes	No	26231	28811	BAC 3		0.9742	bac3.3
comp19022_c0_seq22_m.38466	NA		complete	2247	2220	Yes	No	26231	28811	BAC 3		0.9742	bac3.3
comp19022_c0_seq45_m.38477	NA		complete	897	899	Yes	No	26231	27217	BAC 3		0.976	bac3.3
comp11411_c0_seq3_m.26668	NA		complete	792	792	Yes	No	25175	25966	BAC 3		0.977	bac3.2
comp19022_c0_seq23_m.38422	NA		complete	615	615	Yes	No	28200	28813	BAC 3		0.98	bac3.4
comp19022_c0_seq24_m.38427	NA		complete	615	615	Yes	No	28200	28813	BAC 3		0.98	bac3.4
comp19022_c0_seq31_m.38469	NA		complete	615	615	Yes	No	28200	28813	BAC 3		0.98	bac3.4
comp12519_c3_seq1_m.33356	NA		complete	861	861	Yes	No	219659	220519	Cons 7,13,14,23,24		0.985	bac7,13,14,23,24.22
comp19022_c0_seq40_m.38449	NA		complete	495	495	Yes	No	24588	25082	BAC 3		0.986	bac3.2
comp15295_c0_seq2_m.20099	NA		complete	321	316	Yes	No	108609	110043	BAC 2		0.988667	bac3.14	Multuiple genes
comp16202_c0_seq1_m.8802	NA	g15326	complete	360	360	Yes	No	216048	216406	Cons 7,13,14,23,24		0.989	bac7,13,14,23,24.19
comp13069_c0_seq1_m.6639	NA		complete	660	662	Yes	No	53526	55005	BAC 8		0.992667	bac8.10
comp16202_c0_seq1_m.8803	NA	g15327	complete	345	345	Yes	No	215548	215892	Cons 7,13,14,23,24		1	bac7,13,14,23,24.18
comp15980_c0_seq2_m.34240"	p2c10_arath ame: full=probable protein phosphatase 2c 10 short= 2c10		complete	300	305	Yes	No	94831	95247	Cons 12,20		0.9825	bac12,20.9
comp15980_c0_seq1_m.34239"	p2c10_arath ame: full=probable protein phosphatase 2c 10 short= 2c10		complete	843	1163	Yes	No	68434	70944	BAC 5	Cons 12,20	0.987143	bac6.9
comp15980_c0_seq1_m.34239"	p2c10_arath ame: full=probable protein phosphatase 2c 10 short= 2c10		complete	843	858	Yes	No	94831	97341	Cons 12,20	BAC 5	0.989	bac12,20.9
comp16592_c0_seq1_m.9057"	pect1_arath ame: full=ethanolamine-phosphate cytidylyltransferase ame: full=ctp:phosphoethanolamine cytidylyltransferase ame: full=phosphorylethanolamine cytidylyltransferase 1		complete	453	453	Yes	No	36399	37550	BAC 8		0.9905	bac8.6
comp16592_c0_seq1_m.9056"	pect1_arath ame: full=ethanolamine-phosphate cytidylyltransferase ame: full=ctp:phosphoethanolamine cytidylyltransferase ame: full=phosphorylethanolamine cytidylyltransferase 1		complete	1281	1297	Yes	No	32876	37652	BAC 8		0.993333	bac8.5
comp17146_c0_seq1_m.21427"	pyrd_orysj ame: full=dihydroorotate dehydrogenase mitochondrial short=dhodehase ame: full=dihydroorotate oxidase flags: precursor		complete	918	943	Yes	No	68583	73932	BAC 8		0.994	bac8.12
comp16035_c0_seq2_m.20373"	spea_bachd ame: full=arginine decarboxylase		complete	825	823	Yes	No	44374	45196	BAC 8		0.99	bac8.8
comp47366_c0_seq1_m.11499"	str8_arath ame: full=rhodanese-like domain-containing protein chloroplastic ame: full=sulfurtransferase 8 short= tr8 flags: precursor		complete	1221	1227	Yes	No	113175	114762	BAC 8		0.999667	bac8.18
comp955_c0_seq1_m.36205	sut1_styha ame: full=high affinity sulfate transporter 1		complete	660	1119	Yes	No	29680	42243	BAC 3		0.9452	bac3.6

## Sheet: complete, truncated mapping
Name	annotation	SC_PCR	ORF status	ORF length	length blasting to BAC	full length percentage	full length hit?	Duplicated?	contig start	contig end	contig	other contig hit	rough identity	BAC block
comp6556_c0_seq1_m.2385			complete	798	28	0.0350877	No	No	92213	92240	BAC 2		1	bac3.12
comp6556_c0_seq1_m.2385			complete	798	28	0.0350877	No	No	50142	50169	Cons 1,9		1	1,9.5
comp18911_c0_seq2_m.15422			complete	969	36	0.0371517	No	No	89715	89750	Cons 4,21		0.944	bac4,21.8
comp16909_c0_seq1_m.9239			complete	1098	38	0.0346084	No	No	168040	168077	Cons 7,13,14,23,24		1	bac7,13,14,23,24.9
comp19090_c0_seq1_m.10463			complete	1521	49	0.0322156	No	No	114175	114223	BAC 5	Cons 12,20	1	bac6.10
comp19090_c0_seq1_m.10463			complete	1521	49	0.0322156	No	No	51539	51587	Cons 12,20	BAC 5	1	bac12,20.8
comp11183_c0_seq1_m.33168			complete	3213	55	0.017118	No	No	186875	186929	Cons 12,20		1	bac12,20.14
comp11183_c0_seq2_m.33173			complete	3213	55	0.017118	No	No	186875	186929	Cons 12,20		1	bac12,20.14
comp4088_c0_seq1_m.937		g15325	complete	2493	62	0.0248696	No	No	208813	208874	Cons 7,13,14,23,24		0.968	bac7,13,14,23,24.17
comp18838_c0_seq1_m.19132			complete	2292	75	0.0327225	No	No	132276	132350	Cons 4,21	BAC2, BAC1,9	0.92	bac4,21.14
comp18838_c0_seq2_m.19133			complete	2292	75	0.0327225	No	No	132276	132350	Cons 4,21	BAC2, BAC1,9	0.92	bac4,21.14
comp13980_c0_seq1_m.30990			complete	1233	93	0.0754258	No	No	91154	91246	BAC 6		0.892	bac6.6
comp13980_c0_seq2_m.30992			complete	1389	93	0.0669546	No	No	91154	91246	BAC 6		0.892	bac6.6
comp18838_c0_seq1_m.19132			complete	2292	99	0.0431937	No	No	99572	99670	BAC 2	BAC4,21, BAC1,9	0.899	bac3.13
comp18838_c0_seq2_m.19133			complete	2292	99	0.0431937	No	No	99572	99670	BAC 2	BAC4,21, BAC1,9	0.899	bac3.13
comp18838_c0_seq1_m.19132			complete	2292	99	0.0431937	No	No	57501	57599	Cons 1,9	BAC4,21, BAC2	0.899	1,9.6
comp18838_c0_seq2_m.19133			complete	2292	99	0.0431937	No	No	57501	57599	Cons 1,9	BAC4,21, BAC2	0.899	1,9.6
comp14795_c0_seq1_m.26237			complete	378	105	0.277778	No	No	83365	83469	BAC 2	Cons 1,9	0.905	bac3.10
comp17297_c0_seq2_m.16734			complete	918	110	0.119826	No	No	168145	168254	Cons 7,13,14,23,24		0.945	bac7,13,14,23,24.10
comp17297_c0_seq3_m.16735			complete	678	110	0.162242	No	No	168145	168254	Cons 7,13,14,23,24		0.945	bac7,13,14,23,24.11
comp15809_c0_seq1_m.34724			complete	2229	110	0.0493495	No	No	229153	229261	Cons 7,13,14,23,24		0.882	bac7,13,14,23,24.26
comp18944_c0_seq1_m.33542			complete	2502	114	0.0455635	No	No	108621	108733	BAC 2		0.86	bac3.14
comp18944_c0_seq4_m.33545			complete	2214	114	0.0514905	No	No	108621	108733	BAC 2		0.86	bac3.14
comp12884_c0_seq1_m.6489			complete	420	127	0.302381	No	No	214517	214643	Cons 12,20		0.961	bac12,20.25
comp121935_c0_seq1_m.13403			complete	891	177	0.198653	No	No	63704	63879	BAC 6		0.876	bac6.1
comp12206_c0_seq3_m.17014			complete	723	186	0.257261	No	No	38134	38319	Cons 7,13,14,23,24	BAC 3	0.935	bac7,13,14,23,24.4
comp14890_c0_seq1_m.26833			complete	399	187	0.468672	No	No	178818	179003	BAC 11	BAC4,21, BAC8	0.877	bac,11.6
comp14890_c0_seq2_m.26835			complete	399	187	0.468672	No	No	178818	179003	BAC 11	BAC4,21, BAC8	0.877	bac,11.6
comp14890_c0_seq3_m.26837			complete	399	187	0.468672	No	No	178818	179003	BAC 11	BAC4,21, BAC8	0.877	bac,11.6
comp12206_c0_seq3_m.17014			complete	723	187	0.258645	No	No	54424	54610	BAC 3	Cons 7,13,14,23,24	0.92	bac3.7
comp14890_c0_seq1_m.26833			complete	399	189	0.473684	No	No	18143	18330	Cons 4,21	BAC8, BAC11	0.852	bac4,21.2
comp14890_c0_seq2_m.26835			complete	399	189	0.473684	No	No	18143	18330	Cons 4,21	BAC8, BAC11	0.852	bac4,21.2
comp14890_c0_seq3_m.26837			complete	399	189	0.473684	No	No	18143	18330	Cons 4,21	BAC8, BAC11	0.852	bac4,21.2
comp14890_c0_seq1_m.26833			complete	399	190	0.47619	No	No	94125	94314	BAC 8	BAC4m21, BAC11	0.947	bac8.15
comp14890_c0_seq2_m.26835			complete	399	190	0.47619	No	No	94125	94314	BAC 8	BAC4m21, BAC11	0.947	bac8.15
comp14890_c0_seq3_m.26837			complete	399	190	0.47619	No	No	94125	94314	BAC 8	BAC4m21, BAC11	0.947	bac8.15
comp13973_c0_seq1_m.18890			complete	552	190	0.344203	No	No	115612	115792	Cons 4,21		0.826	bac4,21.13
comp13973_c0_seq3_m.18893			complete	552	190	0.344203	No	No	115612	115792	Cons 4,21		0.826	bac4,21.13
comp15634_c0_seq1_m.25464			complete	432	249	0.576389	No	No	168616	169984	Cons 7,13,14,23,24		0.961333	bac7,13,14,23,24.12
comp15634_c0_seq2_m.25466			complete	1194	249	0.208543	No	No	168616	169984	Cons 7,13,14,23,24		0.961333	bac7,13,14,23,24.13
comp10282_c0_seq1_m.37421			complete	300	277	0.923333	Maybe	No	143178	145183	BAC 8		0.996333	bac8.20
comp18944_c0_seq3_m.33544			complete	2337	285	0.121951	No	No	109278	109548	BAC 2		0.828	bac3.14
comp18944_c0_seq6_m.33547			complete	2049	285	0.139092	No	No	109278	109548	BAC 2		0.828	bac3.14
comp16039_c1_seq1_m.35113			complete	375	304	0.810667	No	No	139082	139385	BAC 2	Cons 1,9	0.878	bac3.15
comp16039_c1_seq1_m.35113			complete	375	304	0.810667	No	No	97016	97319	Cons 1,9	BAC 2	0.878	1,9.7
comp5423_c0_seq1_m.1852			complete	357	314	0.879552	No	No	19547	19860	BAC 10		0.812	bac10.2
comp14795_c0_seq1_m.26237		gm44415	complete	378	324	0.857143	Maybe	No	41076	41398	Cons 1,9	BAC 2	0.925	1,9.3
comp6133_c0_seq1_m.2133			complete	918	329	0.358388	No	Yes	208238	208739	Cons 7,13,14,23,24		0.931333	bac7,13,14,23,24.16
comp19022_c0_seq23_m.38423			complete	369	334		Maybe	No	24588	24921	BAC 3		0.988	bac3.2
comp19022_c0_seq34_m.38438			complete	369	334		Maybe	No	24588	24921	BAC 3		0.988	bac3.2
comp19022_c0_seq38_m.38447			complete	369	334		Maybe	No	24588	24921	BAC 3		0.988	bac3.2
comp19022_c0_seq4_m.38404			complete	369	334		Maybe	No	24588	24921	BAC 3		0.988	bac3.2
comp19022_c0_seq7_m.38416			complete	369	334		Maybe	No	24588	24921	BAC 3		0.988	bac3.2
comp19022_c0_seq3_m.38399	NA		complete	369	334		Maybe	No	24588	24921	BAC 3		0.988	bac3.2
comp19022_c0_seq25_m.38431			complete	369	334	0.905149	Maybe	No	25175	25966	BAC 3		0.988	bac3.2
comp19026_c0_seq3_m.18292			complete	393	334	0.849873	No	No	19412	19745	BAC 8		0.901	bac8.4
comp10146_c0_seq1_m.27687			complete	594	342	0.575758	No	No	214039	214378	Cons 12,20		0.95	bac12,20.24
comp18911_c0_seq2_m.15425			complete	522	347	0.664751	No	No	91994	92258	Cons 4,21		0.9235	bac4,21.9
comp11027_c0_seq1_m.29245			complete	435	382	0.878161	No	No	113739	114119	Cons 4,21		0.919	bac4,21.12
comp11027_c0_seq4_m.29252			complete	435	382	0.878161	No	No	113739	114119	Cons 4,21		0.919	bac4,21.12
comp15555_c0_seq1_m.8373			complete	447	395	0.883669	No	Yes	15133	131662	BAC 8		0.98	bac8.3
comp18944_c0_seq2_m.33543			complete	2361	399	0.168996	No	No	108621	109548	BAC 2		0.844	bac3.14
comp18944_c0_seq5_m.33546			complete	2073	399	0.192475	No	No	108621	109548	BAC 2		0.844	bac3.14
comp19038_c0_seq1_m.10451		g22704	complete	543	488	0.898711	No	No	87386	87873	Cons 4,21		0.961	bac4,21.7
comp10282_c0_seq1_m.37420			complete	1254	579	0.461722	No	No	137056	145183	BAC 8		0.9978	bac8.20
comp19022_c0_seq17_m.38454			complete	651	613	0.941628	Maybe	No	28200	28811	BAC 3		0.984	bac3.4
comp19022_c0_seq19_m.38460			complete	651	613	0.941628	Maybe	No	28200	28811	BAC 3		0.984	bac3.4
comp19022_c0_seq2_m.38394			complete	651	613	0.941628	Maybe	No	28200	28811	BAC 3		0.984	bac3.4
comp19022_c0_seq38_m.38446			complete	651	613	0.941628	Maybe	No	28200	28811	BAC 3		0.984	bac3.4
comp19022_c0_seq4_m.38403			complete	651	613	0.941628	Maybe	No	28200	28811	BAC 3		0.984	bac3.4
comp19022_c0_seq6_m.38412			complete	651	613	0.941628	Maybe	No	28200	28811	BAC 3		0.984	bac3.4
comp18911_c0_seq1_m.15428			complete	711	647	0.909986	No	No	89715	91476	Cons 4,21		0.923	bac4,21.8
comp18911_c0_seq2_m.15423			complete	711	647	0.909986	No	No	89715	91476	Cons 4,21		0.923	bac4,21.8
comp18911_c0_seq5_m.15435			complete	723	687	0.950207	No	No	89675	91476	Cons 4,21		0.9208	bac4,21.8
comp14795_c0_seq1_m.26236			complete	1050	865	0.82381	No	No	75239	83469	BAC 2	Cons 1,9	0.921833	bac3.9
comp14795_c0_seq1_m.26236		gm44415	complete	1050	952	0.906667	Maybe	No	33168	41398	Cons 1,9	BAC 2	0.929714	1,9.3
comp13628_c0_seq1_m.7014			complete	1119	1055	0.942806	Maybe	No	83920	89037	BAC 8	, Cons 7,13,14,23,24	0.99275	bac8.14
comp18928_c0_seq3_m.24974			complete	2790	1475	0.528674	No	No	1	2403	BAC 8		0.996857	bac8.1
comp18398_c0_seq1_m.33389			complete	4113	1935	0.47046	No	No	69000	71198	BAC 2	Cons 1,9	0.910667	bac3.8
comp18398_c0_seq2_m.33390			complete	4011	1935	0.482423	No	No	69000	71198	BAC 2	Cons 1,9	0.910667	bac3.8
comp18398_c0_seq1_m.33389			complete	4113	1935	0.47046	No	No	26929	29127	Cons 1,9	BAC 2	0.910667	1,9.2
comp18398_c0_seq2_m.33390			complete	4011	1935	0.482423	No	No	26929	29127	Cons 1,9	BAC 2	0.910667	1,9.2
comp18928_c0_seq1_m.24972			complete	3324	2024	0.608905	No	No	1	3979	BAC 8		0.99175	bac8.1
comp19022_c0_seq3_m.38395			complete	2055	2026	0.985888	Maybe	No	26513	28811	BAC 3		0.97075	bac3.3
comp19022_c0_seq5_m.38405			complete	2055	2026	0.985888	Maybe	No	26513	28811	BAC 3		0.97075	bac3.3
comp19022_c0_seq7_m.38413			complete	2055	2026	0.985888	Maybe	No	26513	28811	BAC 3		0.97075	bac3.3
comp19022_c0_seq9_m.38417			complete	2055	2026	0.985888	Maybe	No	26513	28811	BAC 3		0.97075	bac3.3

## Sheet: BAC 2
Name	type	length_aa	length_nt	sum_hits	complete_hit	Multiple gene hits	minBAC	maxBAC	BAC	rough identity	% Pairwise Identity	Free end gaps	Hit end	Hit start	Query end	Query start	Sequence Length
comp14795_c0_seq1|m.26236	complete	350	1050	865	No	No	75239	83469	BAC 2	0.921833	0.947	TRUE	75	1	75313	75239	75
comp14795_c0_seq1|m.26236											0.872	TRUE	253	74	75646	75472	180
comp14795_c0_seq1|m.26236											0.94	TRUE	351	252	76132	76033	100
comp14795_c0_seq1|m.26236											0.935	TRUE	468	345	82669	82548	124
comp14795_c0_seq1|m.26236											0.932	TRUE	863	584	83365	83085	281
comp14795_c0_seq1|m.26236											0.905	TRUE	1001	897	83469	83365	105
comp14795_c0_seq1|m.26237	complete	126	378	105	No	No	83365	83469	BAC 2	0.905	0.905	TRUE	22	126	83469	83365	105
comp14795_c0_seq2|m.26238	complete	125	375	680	Yes	No	75239	83365	BAC 2	0.9348	0.947	TRUE	75	1	75313	75239	75
comp14795_c0_seq2|m.26238											0.872	TRUE	253	74	75646	75472	180
comp14795_c0_seq2|m.26238											0.933	TRUE	370	252	76151	76033	119
comp14795_c0_seq2|m.26238											0.977	TRUE	596	510	82747	82661	87
comp14795_c0_seq2|m.26238											0.945	TRUE	160	378	83365	83147	219
comp14890_c0_seq4|m.26838	3prime_partial	330	990	173	No	No	83365	83469	BAC 2	0.838	0.838	TRUE	171	3	60802	60630	173
comp15295_c0_seq2|m.20099	complete	107	321	316	Yes	No	108609	110043	BAC 2	0.988667	0.984	TRUE	197	321	108733	108609	125
comp15295_c0_seq2|m.20099											1	TRUE	117	194	108947	108870	78
comp15295_c0_seq2|m.20099											0.982	TRUE	4	116	110043	109931	113
comp16039_c1_seq1|m.35112	5prime_partial	665	1995	520	No	No	83365	83469	BAC 2	0.89	0.89	TRUE	1403	1918	139600	139082	520
comp16039_c1_seq1|m.35113	complete	125	375	304	No	No	139082	139385	BAC 2	0.878	0.878	TRUE	373	71	139385	139082	304
comp17331_c1_seq7|m.25798	5prime_partial	112	336	150	No	No	91537	91882	BAC 2	0.9395	0.914	TRUE	160	252	91629	91537	93
comp17331_c1_seq7|m.25798											0.965	TRUE	106	162	91882	91826	57
comp17331_c1_seq8|m.25799	5prime_partial	112	336	150	No	No	91537	91882	BAC 2	0.9395	0.914	TRUE	160	252	91629	91537	93
comp17331_c1_seq8|m.25799											0.965	TRUE	106	162	91882	91826	57
comp18398_c0_seq1|m.33389	complete	1371	4113	1935	No	No	69000	71198	BAC 2	0.910667	0.91	TRUE	3705	4113	69402	69000	409
comp18398_c0_seq1|m.33389											0.919	TRUE	3189	3707	70195	69680	519
comp18398_c0_seq1|m.33389											0.903	TRUE	2146	3151	71198	70196	1007
comp18398_c0_seq2|m.33390	complete	1337	4011	1935	No	No	69000	71198	BAC 2	0.910667	0.91	TRUE	3603	4011	69402	69000	409
comp18398_c0_seq2|m.33390											0.919	TRUE	3087	3605	70195	69680	519
comp18398_c0_seq2|m.33390											0.903	TRUE	2044	3049	71198	70196	1007
comp18838_c0_seq1|m.19132	complete	764	2292	99	No	No	99572	99670	BAC 2	0.899	0.899	TRUE	2286	2188	99670	99572	99
comp18838_c0_seq2|m.19133	complete	764	2292	99	No	No	99572	99670	BAC 2	0.899	0.899	TRUE	2286	2188	99670	99572	99
comp18944_c0_seq1|m.33542	complete	834	2502	114	No	No	108621	108733	BAC 2	0.86	0.86	TRUE	1414	1526	108733	108621	114
comp18944_c0_seq2|m.33543	complete	787	2361	399	No	No	108621	109548	BAC 2	0.844	0.86	TRUE	1273	1385	108733	108621	114
comp18944_c0_seq2|m.33543			0								0.828	TRUE	745	1023	109548	109278	285
comp18944_c0_seq3|m.33544	complete	779	2337	285	No	No	109278	109548	BAC 2	0.828	0.828	TRUE	745	1023	109548	109278	285
comp18944_c0_seq4|m.33545	complete	738	2214	114	No	No	108621	108733	BAC 2	0.86	0.86	TRUE	1126	1238	108733	108621	114
comp18944_c0_seq5|m.33546	complete	691	2073	399	No	No	108621	109548	BAC 2	0.844	0.86	TRUE	985	1097	108733	108621	114
comp18944_c0_seq5|m.33546											0.828	TRUE	457	735	109548	109278	285
comp18944_c0_seq6|m.33547	complete	683	2049	285	No	No	109278	109548	BAC 2	0.828	0.828	TRUE	457	735	109548	109278	285
comp18944_c0_seq7|m.33548	5prime_partial	699	2097	114	No	No	108621	108733	BAC 2	0.86	0.86	TRUE	1009	1121	108733	108621	114
comp18944_c0_seq8|m.33549	5prime_partial	652	1956	399	No	No	108621	109548	BAC 2	0.8355	0.86	TRUE	868	980	108733	108621	114
comp18944_c0_seq8|m.33549											0.811	TRUE	340	618	109548	109278	285
comp18944_c0_seq9|m.33550	5prime_partial	644	1932	285	No	No	109278	109548	BAC 2	0.811	0.811	TRUE	340	618	109548	109278	285
comp6556_c0_seq1|m.2385	complete	266	798	28	No	No	92213	92240	BAC 2	1	1	TRUE	771	798	92240	92213	28

## Sheet: BAC 3
Name	type	length_aa	length_nt	sum_hits	complete_hit	Multiple gene hits	minBAC	maxBAC	BAC	rough identity	% Pairwise Identity	Free end gaps	Hit end	Hit start	Query end	Query start	Sequence Length
comp11411_c0_seq3|m.26668	complete	264	792	792	Yes	No	25175	25966	BAC 3	0.977	0.977	TRUE	792	1	25966	25175	792
comp12206_c0_seq3|m.17014	complete	241	723	187	No	No	54424	54610	BAC 3	0.92	0.92	TRUE	536	722	54610	54424	187
comp145889_c0_seq1|m.14028	internal	206	618	534	No	No	2044	2575	BAC 3	0.74	0.74	TRUE	84	615	2575	2044	534
comp19022_c0_seq17|m.38451	complete	390	1170	1175	Yes	No	26513	27871	BAC 3	0.968333	0.964	TRUE	674	1	27186	26513	674
comp19022_c0_seq17|m.38451											0.978	TRUE	762	671	27367	27276	92
comp19022_c0_seq17|m.38451											0.963	TRUE	1170	763	27871	27463	409
comp19022_c0_seq17|m.38454	complete	217	651	613	Maybe	No	28200	28811	BAC 3	0.984	0.984	TRUE	613	1	28811	28200	613
comp19022_c0_seq18|m.38455	complete	685	2055	2026	Yes	No	26513	28811	BAC 3	0.97075	0.964	TRUE	674	1	27186	26513	674
comp19022_c0_seq18|m.38455											0.978	TRUE	762	671	27367	27276	92
comp19022_c0_seq18|m.38455											0.962	TRUE	1159	763	27860	27463	398
comp19022_c0_seq18|m.38455											0.979	TRUE	2017	1156	28811	27951	862
comp19022_c0_seq19|m.38459	complete	390	1170	1175	Yes	No	26513	27871	BAC 3	0.968333	0.964	TRUE	674	1	27186	26513	674
comp19022_c0_seq19|m.38459											0.978	TRUE	762	671	27367	27276	92
comp19022_c0_seq19|m.38459											0.963	TRUE	1170	763	27871	27463	409
comp19022_c0_seq19|m.38460	complete	217	651	613	Maybe	No	28200	28811	BAC 3	0.984	0.984	TRUE	613	1	28811	28200	613
comp19022_c0_seq2|m.38390	5prime_partial	406	1218	1198	No	No	23663	24921	BAC 3	0.9775	0.972	TRUE	892	1	24557	23663	895
comp19022_c0_seq2|m.38390											0.983	TRUE	1183	881	24921	24620	303
comp19022_c0_seq2|m.38391	complete	390	1170	1175	Yes	No	26513	27871	BAC 3	0.968333	0.964	TRUE	674	1	27186	26513	674
comp19022_c0_seq2|m.38391											0.978	TRUE	762	671	27367	27276	92
comp19022_c0_seq2|m.38391											0.963	TRUE	1170	763	27871	27463	409
comp19022_c0_seq2|m.38394	complete	217	651	613	Maybe	No	28200	28811	BAC 3	0.984	0.984	TRUE	613	1	28811	28200	613
comp19022_c0_seq20|m.38461	complete	749	2247	2220	Yes	No	26231	28811	BAC 3	0.9742	0.99	TRUE	100	1	26330	26231	100
comp19022_c0_seq20|m.38461											0.962	TRUE	866	99	27186	26419	768
comp19022_c0_seq20|m.38461											0.978	TRUE	954	863	27367	27276	92
comp19022_c0_seq20|m.38461											0.962	TRUE	1351	955	27860	27463	398
comp19022_c0_seq20|m.38461											0.979	TRUE	2209	1348	28811	27951	862
comp19022_c0_seq21|m.38464	complete	685	2055	2026	Yes	No	26513	28811	BAC 3	0.97075	0.964	TRUE	674	1	27186	26513	674
comp19022_c0_seq21|m.38464											0.978	TRUE	762	671	27367	27276	92
comp19022_c0_seq21|m.38464											0.962	TRUE	1159	763	27860	27463	398
comp19022_c0_seq21|m.38464											0.979	TRUE	2017	1156	28811	27951	862
comp19022_c0_seq22|m.38466	complete	749	2247	2220	Yes	No	26231	28811	BAC 3	0.9742	0.99	TRUE	100	1	26330	26231	100
comp19022_c0_seq22|m.38466											0.962	TRUE	866	99	27186	26419	768
comp19022_c0_seq22|m.38466											0.978	TRUE	954	863	27367	27276	92
comp19022_c0_seq22|m.38466											0.962	TRUE	1351	955	27860	27463	398
comp19022_c0_seq22|m.38466											0.979	TRUE	2209	1348	28811	27951	862
comp19022_c0_seq23|m.38420	complete	390	1170	1175	Yes	No	26513	27871	BAC 3	0.968333	0.964	TRUE	674	1	27186	26513	674
comp19022_c0_seq23|m.38420											0.978	TRUE	762	671	27367	27276	92
comp19022_c0_seq23|m.38420											0.963	TRUE	1170	763	27871	27463	409
comp19022_c0_seq23|m.38421	5prime_partial	306	918	921	No	No	23663	24583	BAC 3	0.973	0.973	TRUE	918	1	24583	23663	921
comp19022_c0_seq23|m.38422	complete	205	615	615	Yes	No	28200	28813	BAC 3	0.98	0.98	TRUE	615	1	28813	28200	615
comp19022_c0_seq23|m.38423	complete	123	369	334	Maybe	No	24588	24921	BAC 3	0.988	0.988	TRUE	334	1	24921	24588	334
comp19022_c0_seq23|m.38424	5prime_partial	105	315	315	No	No	28545	28858	BAC 3	0.975	0.975	TRUE	1	315	28858	28545	315
comp19022_c0_seq24|m.38425	5prime_partial	406	1218	895	No	No	23663	24921	BAC 3	0.9775	0.972	TRUE	892	1	24557	23663	895
comp19022_c0_seq24|m.38425											0.983	TRUE	1183	881	24921	24620	303
comp19022_c0_seq24|m.38426	complete	390	1170	1175	Yes	No	26513	27871	BAC 3	0.968333	0.964	TRUE	674	1	27186	26513	674
comp19022_c0_seq24|m.38426											0.978	TRUE	762	671	27367	27276	92
comp19022_c0_seq24|m.38426											0.963	TRUE	1170	763	27871	27463	409
comp19022_c0_seq24|m.38427	complete	205	615	615	Yes	No	28200	28813	BAC 3	0.98	0.98	TRUE	615	1	28813	28200	615
comp19022_c0_seq24|m.38428	5prime_partial	105	315	315	No	No	28545	28858	BAC 3	0.975	0.975	TRUE	1	315	28858	28545	315
comp19022_c0_seq25|m.38429	complete	673	2019	2028	Yes	No	26513	28813	BAC 3	0.97025	0.964	TRUE	674	1	27186	26513	674
comp19022_c0_seq25|m.38429											0.978	TRUE	762	671	27367	27276	92
comp19022_c0_seq25|m.38429											0.962	TRUE	1159	763	27860	27463	398
comp19022_c0_seq25|m.38429											0.977	TRUE	2019	1156	28813	27951	864
comp19022_c0_seq25|m.38430	5prime_partial	306	918	921	No	No	23663	24583	BAC 3	0.973	0.973	TRUE	918	1	24583	23663	921
comp19022_c0_seq25|m.38431	complete	123	369	334	Maybe	No	25175	25966	BAC 3	0.988	0.988	TRUE	334	1	24921	24588	334
comp19022_c0_seq25|m.38432	5prime_partial	105	315	315	No	No	28545	28858	BAC 3	0.975	0.975	TRUE	1	315	28858	28545	315
comp19022_c0_seq26|m.38433	complete	673	2019	2028	Yes	No	26513	28813	BAC 3	0.97025	0.964	TRUE	674	1	27186	26513	674
comp19022_c0_seq26|m.38433											0.978	TRUE	762	671	27367	27276	92
comp19022_c0_seq26|m.38433											0.962	TRUE	1159	763	27860	27463	398
comp19022_c0_seq26|m.38433											0.977	TRUE	2019	1156	28813	27951	864
comp19022_c0_seq26|m.38434	5prime_partial	406	1218	1198	No	No	23663	24921	BAC 3	0.9775	0.972	TRUE	892	1	24557	23663	895
comp19022_c0_seq26|m.38434											0.983	TRUE	1183	881	24921	24620	303
comp19022_c0_seq26|m.38435	5prime_partial	105	315	315	No	No	28545	28858	BAC 3	0.975	0.975	TRUE	1	315	28858	28545	315
comp19022_c0_seq3|m.38395	complete	685	2055	2026	Maybe	No	26513	28811	BAC 3	0.97075	0.964	TRUE	674	1	27186	26513	674
comp19022_c0_seq3|m.38395											0.978	TRUE	762	671	27367	27276	92
comp19022_c0_seq3|m.38395											0.962	TRUE	1159	763	27860	27463	398
comp19022_c0_seq3|m.38395											0.979	TRUE	2017	1156	28811	27951	862
comp19022_c0_seq3|m.38396	5prime_partial	306	918	921	No	No	23663	24583	BAC 3	0.973	0.973	TRUE	918	1	24583	23663	921
comp19022_c0_seq3|m.38399	complete	123	369	334	Maybe	No	24588	24921	BAC 3	0.988	0.988	TRUE	334	1	24921	24588	334
comp19022_c0_seq31|m.38468	complete	390	1170	1175	Yes	No	26513	27871	BAC 3	0.968333	0.964	TRUE	674	1	27186	26513	674
comp19022_c0_seq31|m.38468											0.978	TRUE	762	671	27367	27276	92
comp19022_c0_seq31|m.38468											0.963	TRUE	1170	763	27871	27463	409
comp19022_c0_seq31|m.38469	complete	205	615	615	Yes	No	28200	28813	BAC 3	0.98	0.98	TRUE	615	1	28813	28200	615
comp19022_c0_seq31|m.38470	5prime_partial	105	315	315	No	No	28545	28858	BAC 3	0.975	0.975	TRUE	1	315	28858	28545	315
comp19022_c0_seq32|m.38471	complete	673	2019	2028	Yes	No	26513	28813	BAC 3	0.97025	0.964	TRUE	674	1	27186	26513	674
comp19022_c0_seq32|m.38471											0.978	TRUE	762	671	27367	27276	92
comp19022_c0_seq32|m.38471											0.962	TRUE	1159	763	27860	27463	398
comp19022_c0_seq32|m.38471											0.977	TRUE	2019	1156	28813	27951	864
comp19022_c0_seq32|m.38472	5prime_partial	105	315	315	No	No	28545	28858	BAC 3	0.975	0.975	TRUE	1	315	28858	28545	315
comp19022_c0_seq33|m.38473	complete	737	2211	2222	Yes	No	26231	28813	BAC 3	0.9738	0.99	TRUE	100	1	26330	26231	100
comp19022_c0_seq33|m.38473											0.962	TRUE	866	99	27186	26419	768
comp19022_c0_seq33|m.38473											0.978	TRUE	954	863	27367	27276	92
comp19022_c0_seq33|m.38473											0.962	TRUE	1351	955	27860	27463	398
comp19022_c0_seq33|m.38473											0.977	TRUE	2211	1348	28813	27951	864
comp19022_c0_seq33|m.38474	5prime_partial	105	315	315	No	No	28545	28858	BAC 3	0.975	0.975	TRUE	1	315	28858	28545	315
comp19022_c0_seq34|m.38436	5prime_partial	306	918	921	No	No	23663	24583	BAC 3	0.973	0.973	TRUE	918	1	24583	23663	921
comp19022_c0_seq34|m.38437	complete	235	705	705	Yes	No	26513	27217	BAC 3	0.965	0.965	TRUE	705	1	27217	26513	705
comp19022_c0_seq34|m.38438	complete	123	369	334	Maybe	No	24588	24921	BAC 3	0.988	0.988	TRUE	334	1	24921	24588	334
comp19022_c0_seq35|m.38439	5prime_partial	406	1218	1198	Maybe	No	23663	24921	BAC 3	0.9775	0.972	TRUE	892	1	24557	23663	895
comp19022_c0_seq35|m.38439											0.983	TRUE	1183	881	24921	24620	303
comp19022_c0_seq35|m.38440	complete	235	705	705	Yes	No	26513	27217	BAC 3	0.965	0.965	TRUE	705	1	27217	26513	705
comp19022_c0_seq38|m.38441	complete	398	1194	1197	Yes	No	23387	24583	BAC 3	0.971	0.971	TRUE	1194	1	24583	23387	1197
comp19022_c0_seq38|m.38442	complete	390	1170	1175	Yes	No	26513	27871	BAC 3	0.968333	0.964	TRUE	674	1	27186	26513	674
comp19022_c0_seq38|m.38442											0.978	TRUE	762	671	27367	27276	92
comp19022_c0_seq38|m.38442											0.963	TRUE	1170	763	27871	27463	409
comp19022_c0_seq38|m.38446	complete	217	651	613	Maybe	No	28200	28811	BAC 3	0.984	0.984	TRUE	613	1	28811	28200	613
comp19022_c0_seq38|m.38447	complete	123	369	334	Maybe	No	24588	24921	BAC 3	0.988	0.988	TRUE	334	1	24921	24588	334
comp19022_c0_seq39|m.38475	complete	454	1362	1369	Yes	No	26231	27871	BAC 3	0.97325	0.99	TRUE	100	1	26330	26231	100
comp19022_c0_seq39|m.38475											0.962	TRUE	866	99	27186	26419	768
comp19022_c0_seq39|m.38475											0.978	TRUE	954	863	27367	27276	92
comp19022_c0_seq39|m.38475											0.963	TRUE	1362	955	27871	27463	409
comp19022_c0_seq4|m.38401	complete	390	1170	1175	Yes	No	26513	27871	BAC 3	0.968333	0.964	TRUE	674	1	27186	26513	674
comp19022_c0_seq4|m.38401											0.978	TRUE	762	671	27367	27276	92
comp19022_c0_seq4|m.38401											0.963	TRUE	1170	763	27871	27463	409
comp19022_c0_seq4|m.38402	5prime_partial	306	918	921	No	No	23663	24583	BAC 3	0.973	0.973	TRUE	918	1	24583	23663	921
comp19022_c0_seq4|m.38403	complete	217	651	613	Maybe	No	28200	28811	BAC 3	0.984	0.984	TRUE	613	1	28811	28200	613
comp19022_c0_seq4|m.38404	complete	123	369	334	Maybe	No	24588	24921	BAC 3	0.988	0.988	TRUE	334	1	24921	24588	334
comp19022_c0_seq40|m.38448	5prime_partial	306	918	921	No	No	23663	24583	BAC 3	0.973	0.973	TRUE	918	1	24583	23663	921
comp19022_c0_seq40|m.38449	complete	165	495	495	Yes	No	24588	25082	BAC 3	0.986	0.986	TRUE	495	1	25082	24588	495
comp19022_c0_seq41|m.38450	5prime_partial	448	1344	1359	No	No	23663	25082	BAC 3	0.9775	0.972	TRUE	892	1	24557	23663	895
comp19022_c0_seq41|m.38450											0.983	TRUE	1344	881	25082	24620	464
comp19022_c0_seq43|m.38476	complete	235	705	705	Yes	No	26513	27217	BAC 3	0.965	0.965	TRUE	705	1	27217	26513	705
comp19022_c0_seq45|m.38477	complete	299	897	899	Yes	No	26231	27217	BAC 3	0.976	0.99	TRUE	100	1	26330	26231	100
comp19022_c0_seq45|m.38477											0.962	TRUE	897	99	27217	26419	799
comp19022_c0_seq5|m.38405	complete	685	2055	2026	Maybe	No	26513	28811	BAC 3	0.97075	0.964	TRUE	674	1	27186	26513	674
comp19022_c0_seq5|m.38405											0.978	TRUE	762	671	27367	27276	92
comp19022_c0_seq5|m.38405											0.962	TRUE	1159	763	27860	27463	398
comp19022_c0_seq5|m.38405											0.979	TRUE	2017	1156	28811	27951	862
comp19022_c0_seq5|m.38406	5prime_partial	406	1218	1198	Maybe	No	23663	24921	BAC 3	0.9775	0.972	TRUE	892	1	24557	23663	895
comp19022_c0_seq5|m.38406											0.983	TRUE	1183	881	24921	24620	303
comp19022_c0_seq6|m.38410	5prime_partial	406	1218	1198	Maybe	No	23663	24921	BAC 3	0.9775	0.972	TRUE	892	1	24557	23663	895
comp19022_c0_seq6|m.38410											0.983	TRUE	1183	881	24921	24620	303
comp19022_c0_seq6|m.38411	complete	390	1170	1175	Yes	No	26513	27871	BAC 3	0.968333	0.964	TRUE	674	1	27186	26513	674
comp19022_c0_seq6|m.38411											0.978	TRUE	762	671	27367	27276	92
comp19022_c0_seq6|m.38411											0.963	TRUE	1170	763	27871	27463	409
comp19022_c0_seq6|m.38412	complete	217	651	613	Maybe	No	28200	28811	BAC 3	0.984	0.984	TRUE	613	1	28811	28200	613
comp19022_c0_seq7|m.38413	complete	685	2055	2026	Maybe	No	26513	28811	BAC 3	0.97075	0.964	TRUE	674	1	27186	26513	674
comp19022_c0_seq7|m.38413											0.978	TRUE	762	671	27367	27276	92
comp19022_c0_seq7|m.38413											0.962	TRUE	1159	763	27860	27463	398
comp19022_c0_seq7|m.38413											0.979	TRUE	2017	1156	28811	27951	862
comp19022_c0_seq7|m.38415	5prime_partial	306	918	921	No	No	23663	24583	BAC 3	0.973	0.973	TRUE	918	1	24583	23663	921
comp19022_c0_seq7|m.38416	complete	123	369	334	Maybe	No	24588	24921	BAC 3	0.988	0.988	TRUE	334	1	24921	24588	334
comp19022_c0_seq9|m.38417	complete	685	2055	2026	Maybe	No	26513	28811	BAC 3	0.97075	0.964	TRUE	674	1	27186	26513	674
comp19022_c0_seq9|m.38417											0.978	TRUE	762	671	27367	27276	92
comp19022_c0_seq9|m.38417											0.962	TRUE	1159	763	27860	27463	398
comp19022_c0_seq9|m.38417											0.979	TRUE	2017	1156	28811	27951	862
comp19022_c0_seq9|m.38419	5prime_partial	406	1218	1198	No	No	23663	24921	BAC 3	0.9775	0.972	TRUE	892	1	24557	23663	895
comp19022_c0_seq9|m.38419											0.983	TRUE	1183	881	24921	24620	303
comp955_c0_seq1|m.36205	complete	220	660	1119	Yes	No	29680	42243	BAC 3	0.9452	0.851	TRUE	448	660	29889	29680	215
comp955_c0_seq1|m.36205											0.974	TRUE	259	450	30171	29980	192
comp955_c0_seq1|m.36205											0.962	TRUE	1	260	30520	30261	260
comp955_c0_seq1|m.36205											0.974	TRUE	259	450	41894	41703	192
comp955_c0_seq1|m.36205											0.965	TRUE	1	260	42243	41984	260

## Sheet: BAC 5
Name	type	length_aa	length_nt	sum_hits	complete_hit	Multiple gene hits	minBAC	maxBAC	BAC	rough identity	% Pairwise Identity	Free end gaps	Hit end	Hit start	Query end	Query start	Sequence Length
comp111350_c0_seq1|m.13117	5prime_partial	197	591	591	No	No	117838	118428	BAC 5	0.929	0.929	TRUE	591	1	118428	117838	591
comp1371_c0_seq1|m.365	internal	143	429	426	No	No	117838	118428	BAC 5	0.911	0.911	TRUE	426	1	117537	117118	426
comp15980_c0_seq1|m.34239	complete	281	843	1163	Yes	No	68434	70944	BAC 5	0.987143	1	TRUE	29	1	68462	68434	29
comp15980_c0_seq1|m.34239											0.98	TRUE	274	31	69457	69217	244
comp15980_c0_seq1|m.34239											1	TRUE	551	272	69852	69573	280
comp15980_c0_seq1|m.34239											0.994	TRUE	711	548	70692	70528	165
comp15980_c0_seq1|m.34239											0.971	TRUE	843	704	70944	70805	140
comp15980_c0_seq2|m.34240											0.994	TRUE	168	5	70692	70528	165
comp15980_c0_seq2|m.34240											0.971	TRUE	300	161	70944	70805	140
comp179462_c0_seq1|m.14529	internal	153	459	389	No	No	123888	124267	BAC 5	0.897	0.897	TRUE	1	381	124267	123888	389
comp19090_c0_seq1|m.10463	complete	507	1521	49	No	No	114175	114223	BAC 5	1	1	TRUE	658	706	114223	114175	49
comp441_c0_seq1|m.124	internal	300	900	670	No	No	136879	137547	BAC 5	0.897	0.897	TRUE	228	897	137547	136879	670
comp4425_c0_seq1|m.1148	5prime_partial	708	2124	57	No	No	114222	114278	BAC 5	0.982	0.982	TRUE	713	657	114278	114222	57
comp479_c0_seq1|m.136	internal	158	474	462	No	No	116389	116850	BAC 5	0.918	0.918	TRUE	471	10	116850	116389	462
comp806_c0_seq1|m.223	5prime_partial	144	432	426	No	No	136591	137016	BAC 5	0.859	0.859	TRUE	4	429	137016	136591	426

## Sheet: BAC 6
Name	type	length_aa	length_nt	sum_hits	complete_hit	Multiple gene hits	minBAC	maxBAC	BAC	rough identity	% Pairwise Identity	Free end gaps	Hit end	Hit start	Query end	Query start	Sequence Length
comp121935_c0_seq1|m.13403	complete	297	891	177	No	No	63704	63879	BAC 6	0.876	0.876	TRUE	176	1	63879	63704	177
comp13980_c0_seq1|m.30990	complete	411	1233	93	No	No	91154	91246	BAC 6	0.892	0.892	TRUE	354	266	91246	91154	93
comp13980_c0_seq2|m.30992	complete	463	1389	93	No	No	91154	91246	BAC 6	0.892	0.892	TRUE	354	266	91246	91154	93
comp148443_c0_seq1|m.14082	5prime_partial	158	474	405	No	No	91977	92380	BAC 6	0.933	0.933	TRUE	1	405	92380	91977	405
comp179462_c0_seq1|m.14529	internal	153	459	321	No	No	83603	83919	BAC 6	0.907	0.907	TRUE	1	321	83919	83603	321
comp216191_c0_seq1|m.14914	internal	117	351	347	No	No	92570	92916	BAC 6	0.893	0.893	TRUE	2	348	92916	92570	347
comp436_c0_seq1|m.121	internal	118	354	325	No	No	78377	79982	BAC 6	0.9485	0.96	TRUE	228	31	78574	78377	198
comp436_c0_seq1|m.121											0.937	TRUE	351	225	79982	79856	127
comp6964_c1_seq1|m.25848	5prime_partial	240	720	351	No	No	90069	90419	BAC 6	0.909	0.909	TRUE	3	353	90419	90069	351
comp80468_c0_seq1|m.12302	5prime_partial	177	531	531	No	No	85599	86129	BAC 6	1	1	TRUE	1	531	86129	85599	531

## Sheet: BAC 8
Name	type	length_aa	length_nt	sum_hits	complete_hit	Multiple gene hits	minBAC	maxBAC	BAC	rough identity	% Pairwise Identity	Free end gaps	Hit end	Hit start	Query end	Query start	Sequence Length
comp10282_c0_seq1|m.37420	complete	418	1254	579	No	No	137056	145183	BAC 8	0.9978	1	TRUE	1134	1254	137176	137056	121
comp10282_c0_seq1|m.37420											1	TRUE	1029	1133	137354	137250	105
comp10282_c0_seq1|m.37420											1	TRUE	875	1031	143258	143102	157
comp10282_c0_seq1|m.37420											0.989	TRUE	784	877	144506	144413	94
comp10282_c0_seq1|m.37420											1	TRUE	686	787	145183	145082	102
comp10282_c0_seq1|m.37421	complete	100	300	277	Maybe	No	143178	145183	BAC 8	0.996333	1	TRUE	81	1	143258	143178	81
comp10282_c0_seq1|m.37421											0.989	TRUE	172	79	144506	144413	94
comp10282_c0_seq1|m.37421											1	TRUE	270	169	145183	145082	102
comp111310_c0_seq1|m.13114	3prime_partial	196	588	595	No	No	110171	110755	BAC 8	0.85	0.85	TRUE	585	1	110755	110171	595
comp12210_c0_seq1|m.25673	5prime_partial	169	507	512	No	No	119446	122694	BAC 8	0.979	0.99	TRUE	300	507	119653	119446	208
comp12210_c0_seq1|m.25673											0.977	TRUE	130	300	121543	121373	171
comp12210_c0_seq1|m.25673											0.97	TRUE	1	133	122694	122562	133
comp12210_c0_seq2|m.25674	5prime_partial	101	303	307	No	No	121370	122694	BAC 8	0.9735	0.977	TRUE	130	303	121543	121370	174
comp12210_c0_seq2|m.25674											0.97	TRUE	1	133	122694	122562	133
comp12210_c1_seq1|m.25672	3prime_partial	276	828	825	No	No	122680	123504	BAC 8	0.989	0.989	TRUE	1	825	123504	122680	825
comp12614_c0_seq1|m.38823	internal	109	327	324	No	No	139343	139666	BAC 8	0.991	0.991	TRUE	324	1	139666	139343	324
comp12614_c1_seq1|m.38824	5prime_partial	660	1980	1980	No	No	139655	141634	BAC 8	0.998	0.998	TRUE	1980	1	141634	139655	1980
comp129367_c0_seq1|m.13676	5prime_partial	259	777	777	No	No	110753	111529	BAC 8	0.997	0.997	TRUE	777	1	111529	110753	777
comp1298_c0_seq1|m.20776	5prime_partial	194	582	220	No	No	57900	58119	BAC 8	0.914	0.914	TRUE	220	1	58119	57900	220
comp13069_c0_seq1|m.6639	complete	220	660	662	Yes	No	53526	55005	BAC 8	0.992667	1	TRUE	344	660	53842	53526	317
comp13069_c0_seq1|m.6639											0.986	TRUE	126	343	54779	54562	218
comp13069_c0_seq1|m.6639											0.992	TRUE	1	127	55005	54879	127
comp13628_c0_seq1|m.7014	complete	373	1119	1055	Maybe	No	83920	89037	BAC 8	0.99275	1	TRUE	1003	1119	84036	83920	117
comp13628_c0_seq1|m.7014											0.982	TRUE	841	1009	85493	85324	170
comp13628_c0_seq1|m.7014											1	TRUE	742	841	85687	85588	100
comp13628_c0_seq1|m.7014											0.987	TRUE	607	682	86454	86379	76
comp13628_c0_seq1|m.7014											0.988	TRUE	522	605	86640	86557	84
comp13628_c0_seq1|m.7014											0.985	TRUE	200	525	87343	87018	326
comp13628_c0_seq1|m.7014											1	TRUE	160	200	88655	88615	41
comp13628_c0_seq1|m.7014											1	TRUE	23	163	89037	88897	141
comp13781_c0_seq1|m.7115	complete	279	837	841	Yes	No	79040	82011	BAC 8	0.9954	1	TRUE	709	837	79168	79040	129
comp13781_c0_seq1|m.7115											1	TRUE	596	709	79470	79357	114
comp13781_c0_seq1|m.7115											0.984	TRUE	410	595	80927	80742	186
comp13781_c0_seq1|m.7115											1	TRUE	267	410	81579	81436	144
comp13781_c0_seq1|m.7115											0.993	TRUE	1	268	82011	81744	268
comp14504_c0_seq1|m.39143	complete	319	957	965	Yes	No	46612	50332	BAC 8	0.995	0.98	TRUE	807	957	46762	46612	151
comp14504_c0_seq1|m.39143											1	TRUE	654	808	48184	48030	155
comp14504_c0_seq1|m.39143											1	TRUE	600	655	48347	48292	56
comp14504_c0_seq1|m.39143											1	TRUE	1	603	50332	49730	603
comp14890_c0_seq1|m.26831	3prime_partial	409	1227	972	No	No	94125	95096	BAC 8	0.901	0.901	TRUE	1224	280	95096	94125	972
comp14890_c0_seq1|m.26833	complete	133	399	190	No	No	94125	94314	BAC 8	0.947	0.947	TRUE	399	210	94314	94125	190
comp14890_c0_seq2|m.26834	3prime_partial	553	1659	972	No	No	94125	95096	BAC 8	0.901	0.901	TRUE	1656	712	95096	94125	972
comp14890_c0_seq2|m.26835	complete	133	399	190	No	No	94125	94314	BAC 8	0.947	0.947	TRUE	399	210	94314	94125	190
comp14890_c0_seq3|m.26836	3prime_partial	409	1227	972	No	No	94125	95096	BAC 8	0.901	0.901	TRUE	1224	280	95096	94125	972
comp14890_c0_seq3|m.26837	complete	133	399	190	No	No	94125	94314	BAC 8	0.947	0.947	TRUE	399	210	94314	94125	190
comp14890_c0_seq4|m.26838	3prime_partial	330	990	1014	No	No	94083	95096	BAC 8	0.903	0.903	TRUE	987	1	95096	94083	1014
comp15555_c0_seq1|m.8373	complete	149	447	395	No	Yes	15133	131662	BAC 8	0.98	0.956	TRUE	113	1	131292	131183	113
comp15555_c0_seq1|m.8373											0.984	TRUE	388	141	131662	131415	248
comp16021_c0_seq1|m.8673											1	TRUE	3	36	15166	15133	34
comp16035_c0_seq1|m.20372	5prime_partial	571	1713	1729	Maybe	No	42929	45196	BAC 8	0.967	0.917	TRUE	78	1	43012	42929	84
comp16035_c0_seq1|m.20372											0.975	TRUE	159	79	43168	43088	81
comp16035_c0_seq1|m.20372											0.989	TRUE	710	157	44117	43564	554
comp16035_c0_seq1|m.20372											0.987	TRUE	1713	704	45196	44187	1010
comp16035_c0_seq2|m.20373	complete	275	825	823	Yes	No	44374	45196	BAC 8	0.99	0.99	TRUE	825	3	45196	44374	823
comp16035_c0_seq2|m.20374	5prime_partial	273	819	803	No	No	42929	44270	BAC 8	0.96725	0.917	TRUE	78	1	43012	42929	84
comp16035_c0_seq2|m.20374											0.975	TRUE	159	79	43168	43088	81
comp16035_c0_seq2|m.20374											0.989	TRUE	710	157	44117	43564	554
comp16035_c0_seq2|m.20374											0.988	TRUE	787	704	44270	44187	84
comp16592_c0_seq1|m.9056	complete	427	1281	1297	Yes	No	32876	37652	BAC 8	0.993333	1	TRUE	1209	1281	32948	32876	73
comp16592_c0_seq1|m.9056											0.976	TRUE	1087	1209	33237	33115	123
comp16592_c0_seq1|m.9056											1	TRUE	1020	1087	33403	33336	68
comp16592_c0_seq1|m.9056											0.992	TRUE	898	1020	33851	33729	123
comp16592_c0_seq1|m.9056											1	TRUE	830	899	34046	33977	70
comp16592_c0_seq1|m.9056											1	TRUE	758	831	34962	34889	74
comp16592_c0_seq1|m.9056											0.988	TRUE	600	760	35712	35552	161
comp16592_c0_seq1|m.9056											0.992	TRUE	364	602	36587	36349	239
comp16592_c0_seq1|m.9056											0.992	TRUE	1	366	37652	37287	366
comp16592_c0_seq1|m.9057	complete	151	453	453	Yes	No	36399	37550	BAC 8	0.9905	0.989	TRUE	189	1	36587	36399	189
comp16592_c0_seq1|m.9057											0.992	TRUE	450	187	37550	37287	264
comp17146_c0_seq1|m.21427	complete	306	918	943	Yes	No	68583	73932	BAC 8	0.994	1	TRUE	842	918	68659	68583	77
comp17146_c0_seq1|m.21427											0.99	TRUE	741	844	69174	69071	104
comp17146_c0_seq1|m.21427											1	TRUE	705	743	69319	69281	39
comp17146_c0_seq1|m.21427											0.986	TRUE	567	706	70427	70288	140
comp17146_c0_seq1|m.21427											1	TRUE	537	567	71637	71607	31
comp17146_c0_seq1|m.21427											1	TRUE	428	539	71827	71716	112
comp17146_c0_seq1|m.21427											1	TRUE	348	431	72079	71996	84
comp17146_c0_seq1|m.21427											0.992	TRUE	91	354	73643	73380	264
comp17146_c0_seq1|m.21427											0.978	TRUE	1	92	73932	73841	92
comp18206_c0_seq1|m.23424	3prime_partial	332	996	145	No	No	16844	16988	BAC 8	0.91	0.91	TRUE	672	528	16988	16844	145
comp18928_c0_seq1|m.24972	complete	1108	3324	2024	No	No	1	3979	BAC 8	0.99175	0.992	TRUE	1202	1989	788	1	788
comp18928_c0_seq1|m.24972											1	TRUE	1064	1204	1140	1000	141
comp18928_c0_seq1|m.24972											1	TRUE	988	1067	1298	1219	80
comp18928_c0_seq1|m.24972											0.992	TRUE	865	992	1725	1598	128
comp18928_c0_seq1|m.24972											0.994	TRUE	699	867	1990	1822	169
comp18928_c0_seq1|m.24972											1	TRUE	610	701	2195	2104	92
comp18928_c0_seq1|m.24972											1	TRUE	526	611	2412	2327	86
comp18928_c0_seq1|m.24972											0.994	TRUE	370	526	2692	2536	157
comp18928_c0_seq1|m.24972											0.982	TRUE	313	369	2922	2866	57
comp18928_c0_seq1|m.24972											0.981	TRUE	211	313	3133	3031	103
comp18928_c0_seq1|m.24972											0.977	TRUE	87	215	3713	3584	130
comp18928_c0_seq1|m.24972											0.989	TRUE	1	93	3979	3887	93
comp18928_c0_seq3|m.24974	complete	930	2790	1475	No	No	1	2403	BAC 8	0.996857	0.992	TRUE	668	1455	788	1	788
comp18928_c0_seq3|m.24974											1	TRUE	530	670	1140	1000	141
comp18928_c0_seq3|m.24974											1	TRUE	454	533	1298	1219	80
comp18928_c0_seq3|m.24974											0.992	TRUE	331	458	1725	1598	128
comp18928_c0_seq3|m.24974											0.994	TRUE	165	333	1990	1822	169
comp18928_c0_seq3|m.24974											1	TRUE	76	167	2195	2104	92
comp18928_c0_seq3|m.24974											1	TRUE	1	77	2403	2327	77
comp19026_c0_seq1|m.18288	5prime_partial	768	2304	1843	No	No	16842	26241	BAC 8	0.910714	0.88	TRUE	228	79	16988	16842	150
comp19026_c0_seq1|m.18288											0.859	TRUE	1007	290	18262	17518	747
comp19026_c0_seq1|m.18288											0.901	TRUE	1337	1004	19745	19412	334
comp19026_c0_seq1|m.18288											0.93	TRUE	1845	1731	21647	21533	115
comp19026_c0_seq1|m.18288											0.961	TRUE	1919	1844	26062	25987	76
comp19026_c0_seq1|m.18288											0.943	TRUE	2004	1918	26241	26155	87
comp19026_c0_seq1|m.18289											0.901	TRUE	17	350	19745	19412	334
comp19026_c0_seq11|m.18297	internal	496	1488	434	No	No	19475	26241	BAC 8	0.95	0.945	TRUE	275	5	19745	19475	271
comp19026_c0_seq11|m.18297											0.974	TRUE	818	743	26062	25987	76
comp19026_c0_seq11|m.18297											0.931	TRUE	903	817	26241	26155	87
comp19026_c0_seq17|m.18298	5prime_partial	385	1155	550	No	No	19475	26241	BAC 8	0.94075	0.945	TRUE	275	5	19745	19475	271
comp19026_c0_seq17|m.18298											0.914	TRUE	744	629	21647	21532	116
comp19026_c0_seq17|m.18298											0.961	TRUE	818	743	26062	25987	76
comp19026_c0_seq17|m.18298											0.943	TRUE	903	817	26241	26155	87
comp19026_c0_seq3|m.18291	5prime_partial	752	2256	1509	No	No	16842	26241	BAC 8	0.913333	0.88	TRUE	228	79	16988	16842	150
comp19026_c0_seq3|m.18291											0.865	TRUE	1007	290	18262	17518	747
comp19026_c0_seq3|m.18291											0.901	TRUE	1337	1004	19745	19412	334
comp19026_c0_seq3|m.18291											0.93	TRUE	1845	1731	21647	21533	115
comp19026_c0_seq3|m.18291											0.961	TRUE	1919	1844	26062	25987	76
comp19026_c0_seq3|m.18291											0.943	TRUE	2004	1918	26241	26155	87
comp19026_c0_seq3|m.18292	complete	131	393	334	No	No	19412	19745	BAC 8	0.901	0.901	TRUE	17	350	19745	19412	334
comp19026_c0_seq5|m.18294	5prime_partial	401	1203	550	No	No	19475	26241	BAC 8	0.94075	0.945	TRUE	275	5	19745	19475	271
comp19026_c0_seq5|m.18294											0.914	TRUE	744	629	21647	21532	116
comp19026_c0_seq5|m.18294											0.961	TRUE	818	743	26062	25987	76
comp19026_c0_seq5|m.18294											0.943	TRUE	903	817	26241	26155	87
comp19026_c0_seq7|m.18295	internal	513	1539	434	No	No	19475	26241	BAC 8	0.95	0.945	TRUE	275	5	19745	19475	271
comp19026_c0_seq7|m.18295											0.974	TRUE	869	794	26062	25987	76
comp19026_c0_seq7|m.18295											0.931	TRUE	954	868	26241	26155	87
comp19026_c0_seq9|m.18296	internal	503	1509	434	No	No	19475	26241	BAC 8	0.95	0.945	TRUE	275	5	19745	19475	271
comp19026_c0_seq9|m.18296											0.974	TRUE	839	764	26062	25987	76
comp19026_c0_seq9|m.18296											0.931	TRUE	924	838	26241	26155	87
comp3945_c0_seq1|m.18966	5prime_partial	644	1932	131	No	No	8254	8384	BAC 8	0.863	0.863	TRUE	464	334	8384	8254	131
comp47366_c0_seq1|m.11499	complete	407	1221	1227	Yes	No	113175	114762	BAC 8	0.999667	0.999	TRUE	358	1221	114038	113175	864
comp47366_c0_seq1|m.11499											1	TRUE	305	360	114326	114271	56
comp47366_c0_seq1|m.11499											1	TRUE	1	307	114762	114456	307
comp6072_c0_seq1|m.30349	5prime_partial	126	378	137	No	No	16844	16980	BAC 8	0.92	0.92	TRUE	304	168	16980	16844	137
comp9763_c0_seq1|m.19924	internal	369	1107	803	No	No	138465	139267	BAC 8	0.981	0.981	TRUE	1104	302	139267	138465	803
comp9763_c0_seq2|m.19925	internal	368	1104	807	No	No	138465	139267	BAC 8	0.896	0.896	TRUE	1101	302	139267	138465	807

## Sheet: BAC 10
Name	type	length_aa	length_nt	sum_hits	complete_hit	Multiple gene hits	minBAC	maxBAC	BAC	rough identity	% Pairwise Identity	Free end gaps	Hit end	Hit start	Query end	Query start	Sequence Length
comp16827_c0_seq1|m.24467	5prime_partial	158	474	470	No	No	6945	7412	BAC 10	0.921	0.921	TRUE	471	3	7412	6945	470
comp16827_c0_seq1|m.24466	complete	296	888	888	Yes	No	6945	7412	BAC 10	0.85	0.85	TRUE	888	1	8228	7385	888
comp5423_c0_seq1|m.1852	complete	119	357	314	No	No	19547	19860	BAC 10	0.812	0.812	TRUE	35	346	19860	19547	314
comp1743_c0_seq1|m.412	5prime_partial	165	495	371	No	No	31953	32309	BAC 10	0.784	0.784	TRUE	495	127	32309	31953	371
comp10954_c0_seq2|m.16695	internal	115	345	326	No	No	86322	86647	BAC 10	0.936	0.936	TRUE	326	1	86647	86322	326
comp11552_c1_seq1|m.33788	5prime_partial	150	450	452	No	No	86550	87145	BAC 10	0.9435	0.941	TRUE	101	1	86650	86550	101
comp11552_c1_seq1|m.33788											0.946	TRUE	450	100	87145	86795	351
comp11552_c1_seq2|m.33789	5prime_partial	150	450	452	No	No	86550	87145	BAC 10	0.962	0.941	TRUE	101	1	86650	86550	101
comp11552_c1_seq2|m.33789											0.983	TRUE	450	100	87145	86795	351

## Sheet: BAC 11
Name	type	length_aa	length_nt	sum_hits	complete_hit	Multiple gene hits	minBAC	maxBAC	BAC	rough identity	% Pairwise Identity	Free end gaps	Hit end	Hit start	Query end	Query start	Sequence Length
comp11153_c0_seq1|m.5272	5prime_partial	131	393	1996	No	Yes	183470	202882	BAC 11	0.875889	0.833	TRUE	247	393	183616	183470	150
comp11153_c0_seq1|m.5272											0.896	TRUE	1	248	183892	183646	251
comp11153_c0_seq1|m.5272											0.832	TRUE	247	393	188199	188053	149
comp11153_c0_seq1|m.5272											0.904	TRUE	1	248	188475	188229	251
comp11153_c0_seq1|m.5272											0.892	TRUE	248	1	189649	189403	251
comp11153_c0_seq1|m.5272											0.832	TRUE	393	247	189825	189679	149
comp11153_c0_seq1|m.5272											0.9	TRUE	248	1	194238	193992	251
comp11153_c0_seq1|m.5272											0.84	TRUE	393	247	194414	194268	150
comp11153_c0_seq1|m.5272											0.954	TRUE	1	393	202882	202490	394
comp112557_c0_seq1|m.13205	3prime_partial	123	369	33	No	No	94296	94328	BAC 11	1	1	TRUE	366	334	94328	94296	33
comp1180_c0_seq1|m.306	internal	151	453	450	No	No	55283	55732	BAC 11	0.964	0.964	TRUE	450	1	55732	55283	450
comp12522_c0_seq1|m.6223	5prime_partial	225	675	89	No	No	201344	201432	BAC 11	0.966	0.966	TRUE	88	1	201432	201344	89
comp141720_c0_seq1|m.13875	internal	103	309	306	No	No	207269	207574	BAC 11	0.971	0.971	TRUE	1	306	207574	207269	306
comp145179_c0_seq1|m.14002	internal	154	462	474	No	No	57263	57827	BAC 11	0.977	0.994	TRUE	176	1	57438	57263	176
comp145179_c0_seq1|m.14002											0.96	TRUE	459	163	57827	57530	298
comp14760_c0_seq1|m.7807	complete	339	1017	1017	Yes	No	199576	200591	BAC 11	0.957	0.957	TRUE	1017	1	200591	199576	1017
comp14760_c0_seq1|m.7808	complete	133	399	398	Yes	No	198595	198991	BAC 11	0.965	0.965	TRUE	399	2	198991	198595	398
comp14890_c0_seq1|m.26831	3prime_partial	409	1227	950	No	No	178818	179748	BAC 11	0.798	0.798	TRUE	1224	280	179748	178818	950
comp14890_c0_seq1|m.26833	complete	133	399	187	No	No	178818	179003	BAC 11	0.877	0.877	TRUE	395	210	179003	178818	187
comp14890_c0_seq2|m.26834	3prime_partial	553	1659	950	No	No	178818	179748	BAC 11	0.798	0.798	TRUE	1656	712	179748	178818	950
comp14890_c0_seq2|m.26835	complete	133	399	187	No	No	178818	179003	BAC 11	0.877	0.877	TRUE	395	210	179003	178818	187
comp14890_c0_seq3|m.26836	3prime_partial	409	1227	960	No	No	178818	179748	BAC 11	0.798	0.798	TRUE	1224	280	179748	178818	950
comp14890_c0_seq3|m.26837	complete	133	399	187	No	No	178818	179003	BAC 11	0.877	0.877	TRUE	395	210	179003	178818	187
comp14890_c0_seq4|m.26838	3prime_partial	330	990	992	No	No	178776	179748	BAC 11	0.804	0.804	TRUE	987	1	179748	178776	992
comp15591_c0_seq1|m.8403	5prime_partial	176	528	688	No	Yes	58091	75388	BAC 11	0.935	0.964	TRUE	528	1	58619	58091	529
comp15591_c0_seq1|m.8403											0.906	TRUE	461	309	75388	75231	159
comp173291_c0_seq1|m.14464	internal	101	303	300	No	No	204739	205038	BAC 11	0.967	0.967	TRUE	1	300	205038	204739	300
comp173291_c0_seq1|m.14465	internal	101	303	300	No	No	204738	205037	BAC 11	0.967	0.967	TRUE	1	300	205037	204738	300
comp2479_c0_seq1|m.501	internal	114	342	320	No	No	200991	201310	BAC 11	0.947	0.947	TRUE	319	1	201310	200991	320
comp7553_c0_seq1|m.19007	internal	127	381	359	No	No	200668	201011	BAC 11	0.894	0.894	TRUE	378	20	201011	200668	359
comp7553_c0_seq1|m.19008	3prime_partial	103	309	256	No	No	200757	201012	BAC 11	0.93	0.93	TRUE	306	51	201012	200757	256
comp7553_c0_seq2|m.19009	internal	113	339	285	No	No	200668	201011	BAC 11	0.9585	0.945	TRUE	128	20	200776	200668	109
comp7553_c0_seq2|m.19009											0.972	TRUE	336	161	201011	200836	176
comp8527_c1_seq1|m.33895	5prime_partial	210	630	633	No	No	150476	151099	BAC 11	0.809	0.809	TRUE	624	1	151099	150476	633

[truncated: 4 more sheets: Cons 1,9, Cons 4,21, Cons 7,13,14,23,24, Cons 12,20]
